# Supplementary material
Source: PubMed Central journal article supplement (PMC11105851)
Supplement: NIHPP2024.02.04.578811v2-supplement-1.pdf [file NIHPP2024.02.04.578811v2-supplement-1.pdf]

## Supplementary Materials.

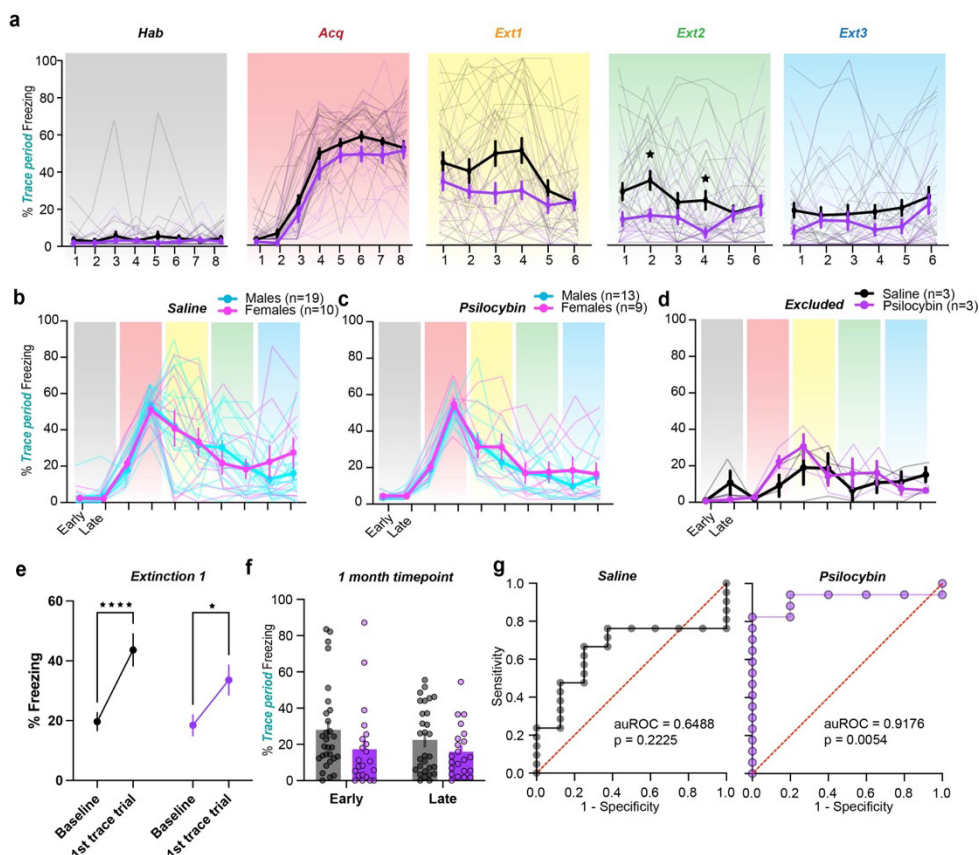

### Supplementary Figure 1 | Effects of psilocybin on trace fear extinction in males and females.

**a.** Trial by trial freezing of saline- and psilocybin-administered mice. Two-Way RM ANOVA with Sidak multiple comparisons correction. (Supp. Table 1, rows 102-106) **b.** Half-session freezing by sex of saline-administered animals. Two-Way RM ANOVA with Sidak multiple comparisons correction. (Supp. Table 1, row 107) **c.** Same as B) in psilocybin-administered animals. Two-Way RM ANOVA with Sidak multiple comparisons correction. (Supp. Table 1, row 108) **d.** Half-session freezing by treatment of excluded animals. Two-Way RM ANOVA with Sidak multiple comparisons correction. (Supp. Table 1, row 109) **e.** Percent freezing during the baseline vs. trace period during Extinction 1. Two-Way RM ANOVA with Sidak multiple comparisons correction. (Supp. Table 1, row 110) **f.** Percent trace-period freezing in early and late periods during an Extinction session 1 month after Extinction 3. Two-Way RM ANOVA with Sidak multiple comparisons correction. (Supp. Table 1, row 111) **g.** ROC curves from logistic regression predicting RE or SE status based on % time freezing during the first half of Extinction 1 during acute drug treatment in saline-administered mice (left) and psilocybin administered mice (right). Right: ROC curve from logistic regression. (Supp. Table 1, rows 12, 14) \*  $p \leq 0.05$ , \*\*  $p < 0.01$ , \*\*\*  $p < 0.001$ , \*\*\*\*  $p < 0.0001$ .

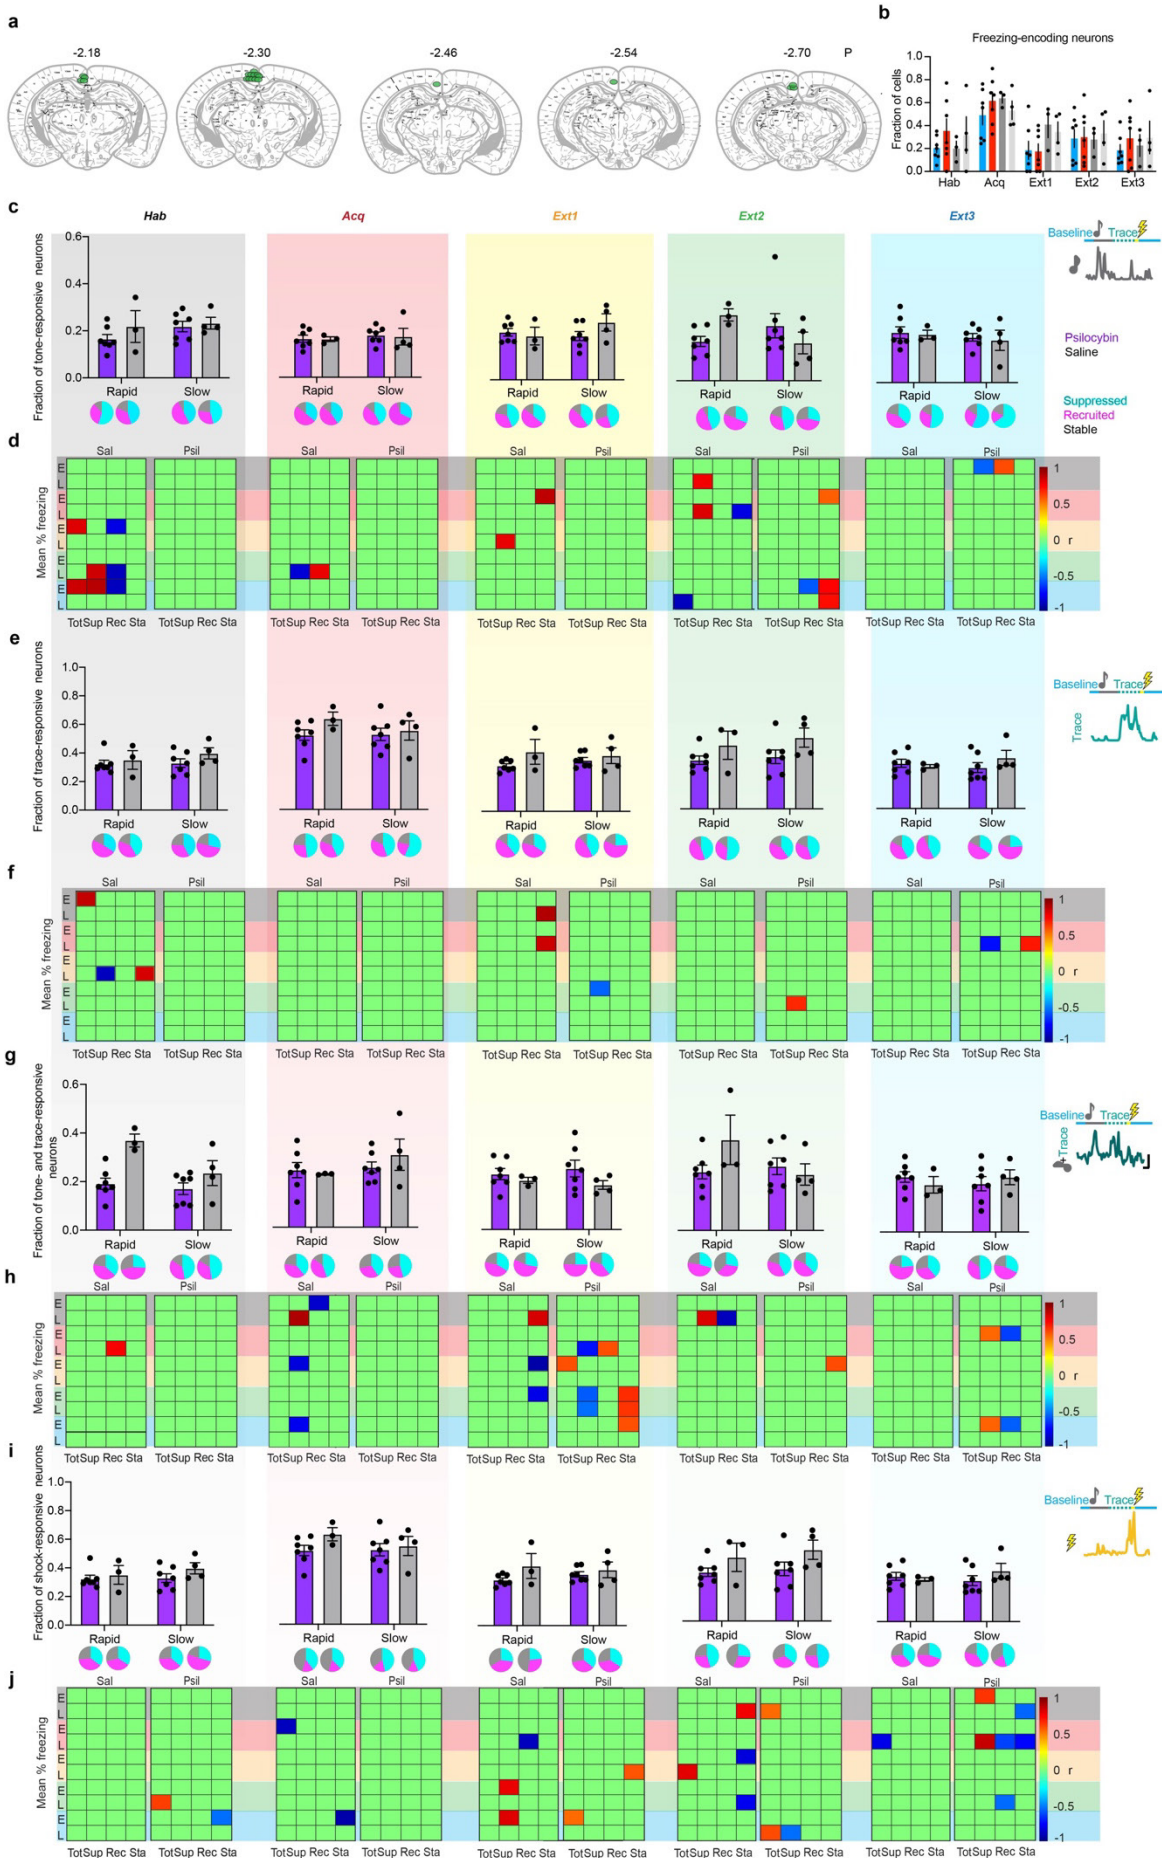

### Supplementary Figure 2 continued | All RSC cells recorded.

**a.** Center and bottom of implant tracts of all included mice from anterior (left) to posterior (right) granular RSC. **b.** Fraction of freezing encoding neurons on each day. Two-way RM ANOVA. (Supp. Table 1, row 112) **c.** Mean fraction of tone-responsive neurons on each day. Insets are proportions of neurons with suppressed, recruited, and stable responses. Two-Way ANOVA. (Supp. Table 1, rows 113-117) **d.** Heatmaps displaying significant correlations (Pearson's rho) between proportions of total (Tot), suppressed (Sup), recruited (Rec), and stable (Sta) tone-responsive neurons on each day and % freezing during the early (E) and late (L) halves of each session (black rows = Hab freezing and black columns = fractions of neurons during Hab, red = Acq, yellow = Ext1, green = Ext2, blue = Ext3). **e,g,i.** Same as C for trace-, tone-and-trace, and shock-responsive neurons. Two-Way ANOVA. (Supp. Table 1, rows 118-132) **f,h,j.** Same as D for trace-, tone-and-trace, and shock-responsive neurons. Data are represented as mean  $\pm$  SEM. \*  $p \leq 0.05$ , \*\*  $p < 0.01$ , \*\*\*  $p < 0.001$ , \*\*\*\*  $p < 0.0001$ .

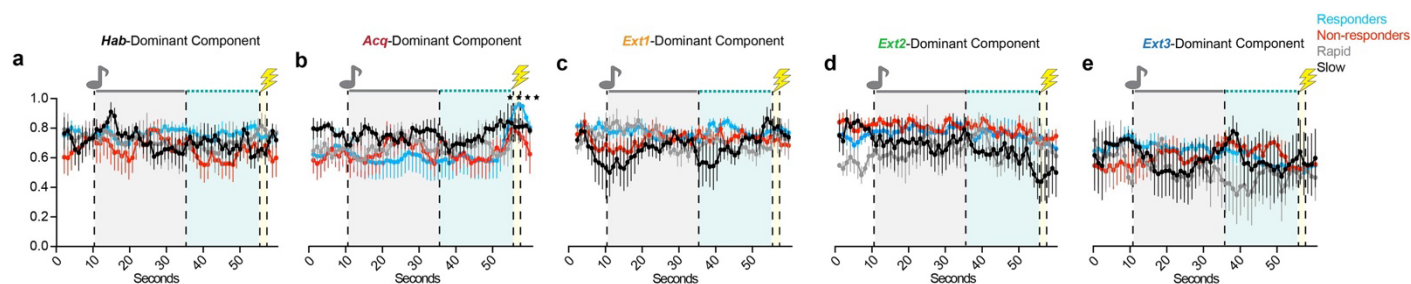

### Supplementary Figure 3 | TCA factors reveal RSC dynamics modulated by session.

**a.** Normalized temporal factor weights by group of the Habituation-dominant component. Two-Way RM ANOVA. (Supp. Table 1, row 133) **b.** Same as A) for the Acquisition-dominant component. Two-Way RM ANOVA. (Supp. Table 1, row 134) **c.** Same as A) for the Extinction 1-dominant component. Two-Way RM ANOVA. (Supp. Table 1, row 135) **d.** Same as A) for the Extinction 2-dominant component. Two-Way RM ANOVA. (Supp. Table 1, row 136) **e.** Same as A) for the Extinction 3-dominant component. Two-Way RM ANOVA. (Supp. Table 1, row 137) Data are represented as mean  $\pm$  SEM. \*  $p \leq 0.05$ , \*\*  $p < 0.01$ , \*\*\*  $p < 0.001$ , \*\*\*\*  $p < 0.0001$ .

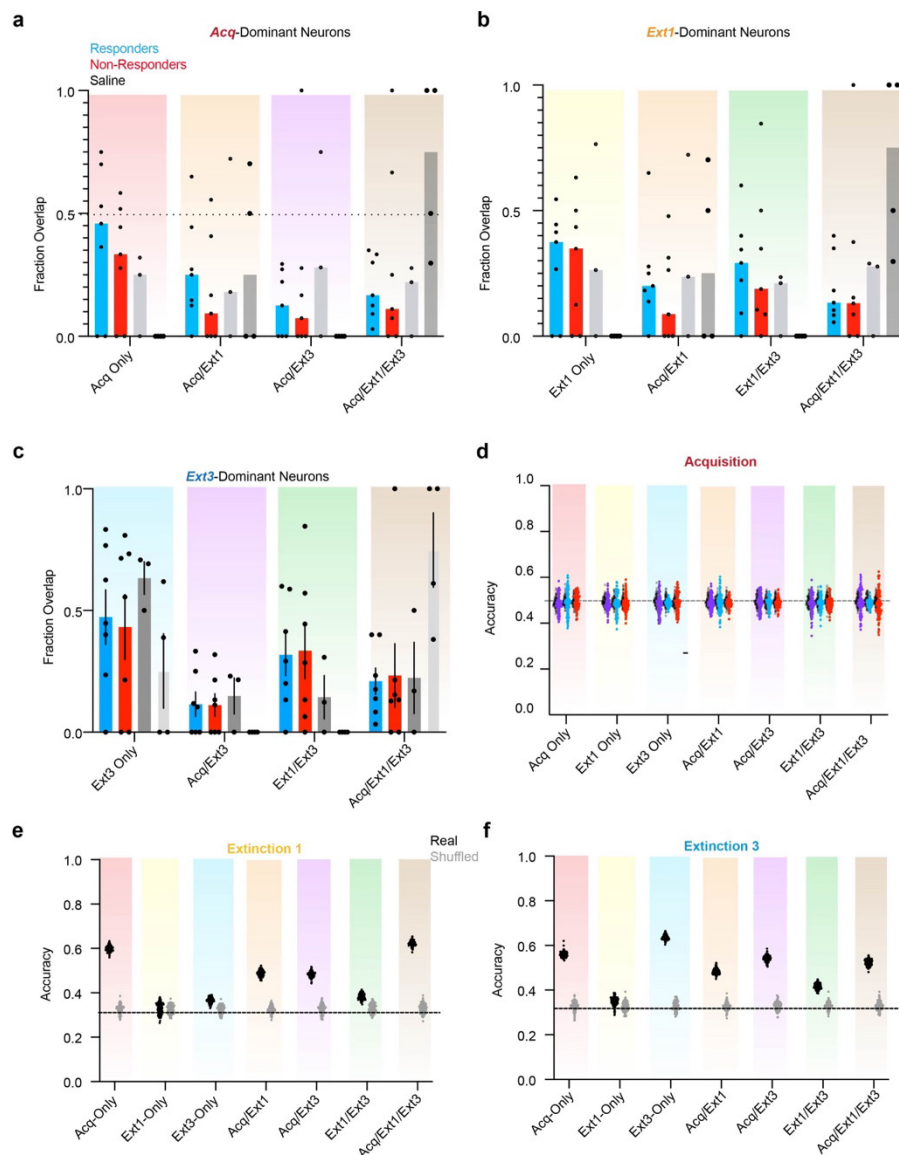

**Supplementary Figure 4 | Psilocybin bidirectionally modulates neural ensembles driving RSC dynamics during TFC in responders.**

**a.** Overlaps of ensembles within individual animals comprising the mean values in Fig. 4B top. Bars are median. **b.** Same as A for Fig. 4B middle. **c.** Same as A for Fig. 4B middle. **d.** Fisher decoder performance on Acquisition activity in functionally defined ensembles of cells to distinguish responders vs. non-responders (purple), responders vs. rapid saline (blue around grey), and non-responders vs. rapid saline (red around grey). 100 iterations for each comparison. Shuffled values are behind real values. **e.** Three-way Fisher decoder performance classifying responders vs. non-responders vs. rapidly extinguishing saline mice trained on activity during Extinction 1. **f.** Same as E for Extinction 3 activity.



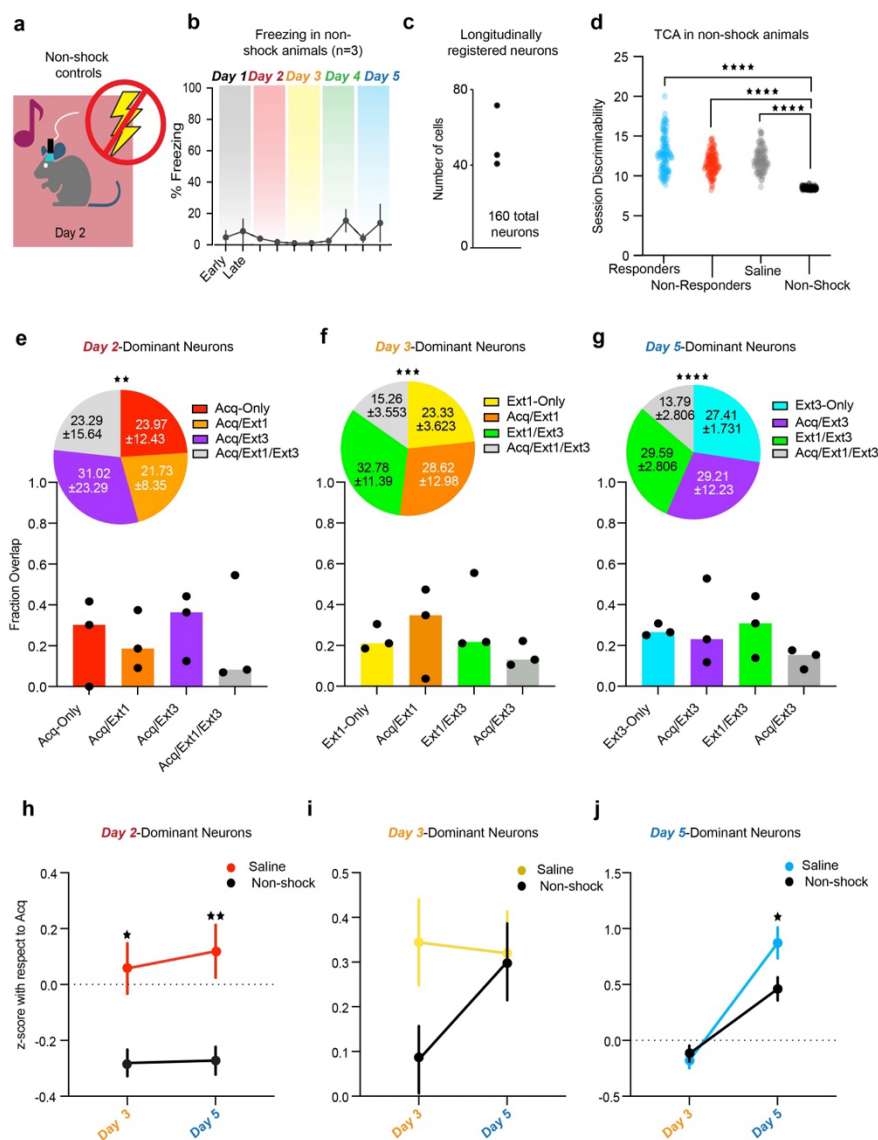

### Supplementary Figure 5 | Non-shock controls do not exhibit conditioning-associated dynamics.

**a.** Schematic of non-shock protocol. 3 Miniscope implanted mice underwent identical 5 day paradigm to all other mice, with the exception that they received no shock during Acquisition or drug treatment. **b.** Half-session freezing in non-shock mice. (Supp. Table 1, row 138). **c.** Number of longitudinally registered neurons in non-shock mice. **d.** Sum of session discriminability index. Because roughly half the number of neurons were recorded in non-shock mice as in the other two groups, pooled tensors from psilocybin responders, non-responders, and saline mice were subsampled to a different, random set of 160 neurons in each of 100 iterations of TCA. One-Way ANOVA. (Supp. Table 1, rows 139). **e.** Overlap of the Day 2-dominant ensemble with Day 3- and Day 5-dominant ensembles in non-shock mice. Bar graphs display the median fraction overlaps. Dots are individual animals. Insets are pie charts displaying total overlap. Stars indicate comparison to saline distribution. Chi-square. (Supp. Table 1, rows 140) **f.** Same as E for the Day 3-dominant ensemble. Chi-square. (Supp. Table 1, rows 141). **g.** Same as F for the Day 5-dominant ensemble. Chi-square. (Supp. Table 1, rows 142) **h.** Average z-score with respect to Day 2 of Day 2-dominant ensemble during Day 3 and 5 in non-shock mice (black) compared to conditioned, saline-administered mice. Two-Way RM ANOVA. (Supp. Table 1, rows 143). **i.** Same as H for the Day 3-dominant ensemble. (Supp. Table 1, rows 144). **j.** Same as H for the Day 5-dominant ensemble. (Supp. Table 1, rows 145). Data are represented as mean  $\pm$  SEM. \*  $p \leq 0.05$ , \*\*  $p < 0.01$ , \*\*\*  $p < 0.001$ , \*\*\*\*  $p < 0.0001$ .

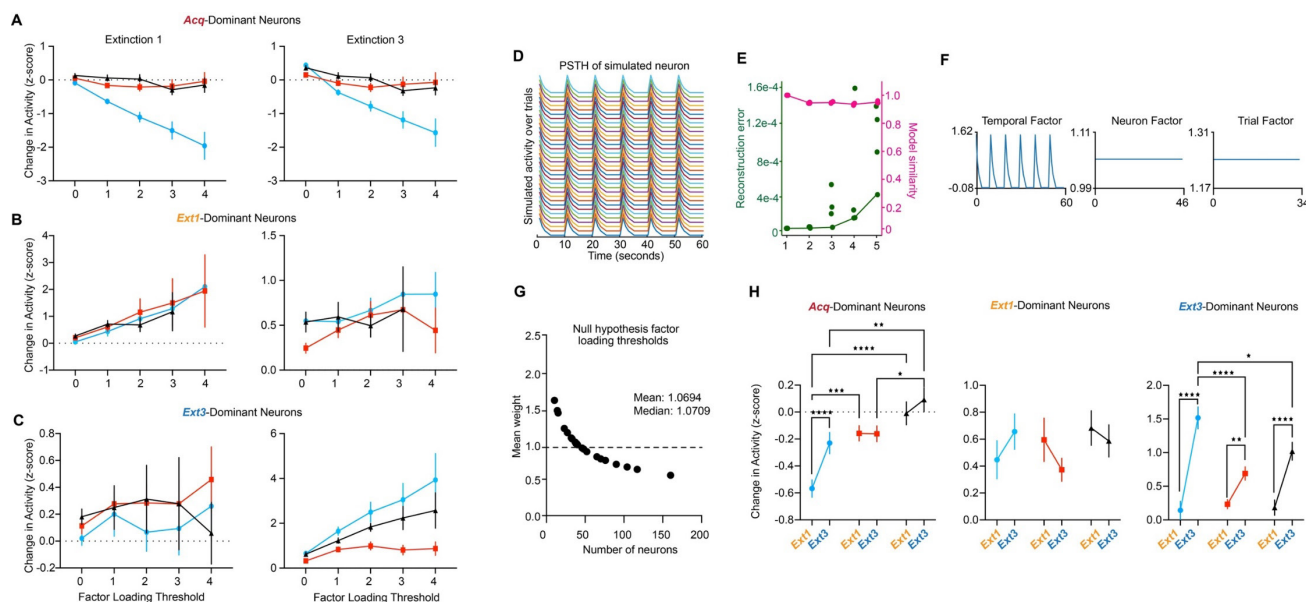

**Supplementary Figure 6 | Results are robust to changes in factor loading thresholds.**

**a.** Change in activity in mean  $\pm$  SEM from *Acquisition* in *Acq*-dominant neurons as a function of factor loading thresholds varying between  $w=0-4$  during *Extinction 1* (left) and *Extinction 3* (right). **b.** Same as A) for *Ext1*-dominant neurons. **c.** Same as A) for *Ext3*-dominant neurons. **d.** PSTH of an example simulated neuron to determine the null hypothesis factor loading threshold. Tensors of  $t \times c \times c \times T$  size, where  $c$  is the number of neurons recorded in a given animal, were created with identically behaving neurons to determine the factor loading threshold in a hypothetical population in which each neuron equally contributes to dynamics, or the null hypothesis factor loading threshold for that animal. **e.** Reconstruction error and model similarity of varying model ranks for populations of identical neurons. A model of rank 1 yields 0 error in this case. **f.** Representative rank 1 TCA of a simulated dataset with  $n=46$  neurons, the median number of neurons recorded in this study. Because variances across trials and neurons were clamped at 0, only the temporal factor varies. **g.** Data in Fig. 4A plotted as a function of number of neurons recorded. Mean weight of neuron factors across 100 iterations of TCA at the number of cells recorded in each animal. **h.** Change in activity in mean  $\pm$  SEM from *Acquisition* during *Extinction 1* and 3 in *Acq*-dominant (left), *Ext1*-dominant (middle), and *Ext3*-dominant (right) using ensembles determined with the null hypothesis factor loading for each animal. Two-way RM ANOVA. (Supp. Table 1, rows 88-90). \*  $p < 0.05$ , \*\*  $p < 0.01$ , \*\*\*  $p < 0.001$ , \*\*\*\*  $p < 0.0001$ .

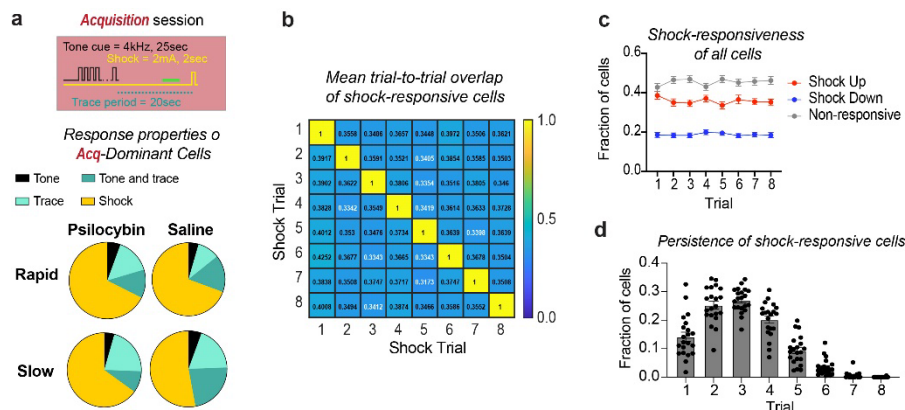

### Supplementary Figure 7 | Shock-responsive neurons are unstable in the RSC.

**a.** Average proportions of Acq-dominant neurons in each group that were upregulated in response to shock, trace, tone, or tone-and-trace. **b.** Heatmap of the average fraction of overlap in shock-up neurons between each trial of Acquisition. Average overlap between trials ranges from 30-45%. **c.** Fractions of shock-up, shock-down, or shock-nonresponsive neurons across all 21 mice on each trial of acquisition, determined by permutation test. **d.** Persistence of the response properties of shock-up neurons over the session. Each point y is the fraction of neurons upregulated in response to the shock for x number of trials. Data are represented as mean  $\pm$  SEM over all 21 mice.

| Row | Figure           | Statistical Model   | Variable              | Degrees of Freedom (DFn, DFd) | Parameter(s)                | Parameter value                | p-value                  | Multiple comparisons? (Sidak test) | p-value                                                                                                                                                                                                                                   | n per group     |
|-----|------------------|---------------------|-----------------------|-------------------------------|-----------------------------|--------------------------------|--------------------------|------------------------------------|-------------------------------------------------------------------------------------------------------------------------------------------------------------------------------------------------------------------------------------------|-----------------|
| 1   | Fig. 1B, panel 1 | Two Way RM-ANOVA    | Treatment             | (1,49)                        | F-statistic                 | 0.2838                         | 0.1969                   |                                    |                                                                                                                                                                                                                                           | 29 sal, 22 psil |
|     |                  |                     | Time                  |                               |                             | 1.712                          | 0.1969                   |                                    |                                                                                                                                                                                                                                           |                 |
|     |                  |                     | Interaction           |                               |                             | 1.715                          | 0.9741                   |                                    |                                                                                                                                                                                                                                           |                 |
| 2   | Fig. 1B, panel 2 | Two Way RM-ANOVA    | Treatment             | (1,49)                        | F-statistic                 | 0.6344                         | 0.4296                   |                                    |                                                                                                                                                                                                                                           | 29 sal, 22 psil |
|     |                  |                     | Time                  |                               |                             | 557.5                          | <0.0001                  |                                    |                                                                                                                                                                                                                                           |                 |
|     |                  |                     | Interaction           |                               |                             | 0.04144                        | 0.8395                   |                                    |                                                                                                                                                                                                                                           |                 |
| 3   | Fig. 1B, panel 3 | Two Way RM-ANOVA    | Treatment             | (1,49)                        | F-statistic                 | 2.863                          | 0.565                    |                                    |                                                                                                                                                                                                                                           | 29 sal, 22 psil |
|     |                  |                     | Time                  |                               |                             | 9.184                          | 0.0039                   |                                    |                                                                                                                                                                                                                                           |                 |
|     |                  |                     | Interaction           |                               |                             | 0.3357                         | 0.097                    |                                    |                                                                                                                                                                                                                                           |                 |
| 4   | Fig. 1B, panel 4 | Two Way RM-ANOVA    | Treatment             | (1,49)                        | F-statistic                 | 5.072                          | 0.0288                   | Sidak: Early, Late                 | Early: 0.0093, Late: 0.3329                                                                                                                                                                                                               | 29 sal, 22 psil |
|     |                  |                     | Time                  |                               |                             | 8.207                          | 0.0061                   |                                    |                                                                                                                                                                                                                                           |                 |
|     |                  |                     | Interaction           |                               |                             | 5.236                          | 0.0265                   |                                    |                                                                                                                                                                                                                                           |                 |
| 5   | Fig. 1B, panel 5 | Two Way RM-ANOVA    | Treatment             | (1,49)                        | F-statistic                 | 1.773                          | 0.6977                   |                                    |                                                                                                                                                                                                                                           | 29 sal, 22 psil |
|     |                  |                     | Time                  |                               |                             | 2.326                          | 0.1337                   |                                    |                                                                                                                                                                                                                                           |                 |
|     |                  |                     | Interaction           |                               |                             | 0.1527                         | 0.1891                   |                                    |                                                                                                                                                                                                                                           |                 |
| 6   | Fig. 1C          | Mann-Whitney        | Treatment             |                               | Mann-Whitney U              | 235                            | 0.1116                   |                                    |                                                                                                                                                                                                                                           | 29 sal, 22 psil |
| 7   | Fig. 1D, panel 1 | Two Way RM-ANOVA    | Treatment             | (3,47)                        | F-statistic                 | 0.7305                         | 0.539                    |                                    |                                                                                                                                                                                                                                           | 5-21 mice       |
|     |                  |                     | Time                  |                               |                             | 0.2511                         | 0.6187                   |                                    |                                                                                                                                                                                                                                           |                 |
|     |                  |                     | Interaction           |                               |                             | 0.5344                         | 0.661                    |                                    |                                                                                                                                                                                                                                           |                 |
| 8   | Fig. 1D, panel 2 | Two Way RM-ANOVA    | Treatment             | (3,47)                        | F-statistic                 | 0.7676                         | 0.518                    |                                    |                                                                                                                                                                                                                                           | 5-21 mice       |
|     |                  |                     | Time                  |                               |                             | 482                            | <0.0001                  |                                    |                                                                                                                                                                                                                                           |                 |
|     |                  |                     | Interaction           |                               |                             | 4.265                          | 0.0096                   |                                    |                                                                                                                                                                                                                                           |                 |
| 9   | Fig. 1D, panel 3 | Two Way RM-ANOVA    | Treatment             | (3,47)                        | F-statistic                 | 2.793                          | 0.0506                   |                                    |                                                                                                                                                                                                                                           | 5-21 mice       |
|     |                  |                     | Time                  |                               |                             | 7.015                          | 0.011                    |                                    |                                                                                                                                                                                                                                           |                 |
|     |                  |                     | Interaction           |                               |                             | 0.9362                         | 0.4307                   |                                    |                                                                                                                                                                                                                                           |                 |
| 10  | Fig. 1D, panel 4 | Two Way RM-ANOVA    | Treatment             | (3,47)                        | F-statistic                 | 5.415                          | 0.0028                   | Sidak: Early, Late                 | Early: Sal RE vs. Psil RE 0.0114; Sal SE vs. Psil SE 0.0059; Late: Sal RE vs. Psil SE 0.0190; Psil RE vs. Sal SE: 0.008; Psil RE vs. Psil SE 0.0337;                                                                                      | 5-21 mice       |
|     |                  |                     | Time                  |                               |                             | 3.069                          | 0.0863                   |                                    |                                                                                                                                                                                                                                           |                 |
|     |                  |                     | Interaction           |                               |                             | 2.948                          | 0.0423                   |                                    |                                                                                                                                                                                                                                           |                 |
| 11  | Fig. 1D, panel 5 | Two Way RM-ANOVA    | Treatment             | (3,47)                        | F-statistic                 | 29.27                          | 0.0001                   | Sidak: Early, Late                 | Early: Sal RE vs. Sal SE <0.0001; Sal RE vs. Psil SE 0.0174; Psil RE vs. Sal SE <0.0001; Psil RE vs. Psil SE <0.0039; Late: Sal RE vs. Sal SE <0.0001; Sal RE vs. Psil SE 0.0001; Psil RE vs. Sal SE <0.0001; Psil RE vs. Psil SE <0.0001 | 5-21 mice       |
|     |                  |                     | Time                  |                               |                             | 7.377                          | 0.0092                   |                                    |                                                                                                                                                                                                                                           |                 |
|     |                  |                     | Interaction           |                               |                             | 2.606                          | 0.2058                   |                                    |                                                                                                                                                                                                                                           |                 |
| 12  | Fig. 1F, panel 1 | Logistic regression | Extinction rate class |                               | beta0/log likelihood/auROC  | 1.458±0.7874 / 0.5949 / 0.6488 | 0.4411/ 0.4405 / 0.2225  |                                    |                                                                                                                                                                                                                                           | 5-21 mice       |
| 13  | Fig. 1F, panel 2 | Two Way RM-ANOVA    | Group                 | (9, 243)                      | F-statistic                 | 17.38                          | 0.0066                   | Sidak: Session half                | Ext3 late: 0.0021                                                                                                                                                                                                                         | 7-18 mice       |
|     |                  |                     | Time                  |                               |                             | 33.75                          | <0.0001                  |                                    |                                                                                                                                                                                                                                           |                 |
|     |                  |                     | Interaction           |                               |                             | 17.38                          | <0.0001                  |                                    |                                                                                                                                                                                                                                           |                 |
| 14  | Fig. 1G, panel 1 | Logistic regression | Extinction rate class |                               | beta0/log likelihood/ auROC | 3.772±1.487 / 6.477 / 0.9251   | 0.0392 / 0.0109 / 0.0054 |                                    |                                                                                                                                                                                                                                           | 5-21 mice       |
| 15  | Fig. 1G, panel 2 | Two Way RM-ANOVA    | Group                 | (9, 243)                      | F-statistic                 | 16.97                          | 0.0005                   | Sidak: Session half                | Ext1 late: 0.0235; Ext2 late: 0.006; Ext3 late: 0.0143                                                                                                                                                                                    | 7-18 mice       |
|     |                  |                     | Time                  |                               |                             | 39.91                          | <0.0001                  |                                    |                                                                                                                                                                                                                                           |                 |
|     |                  |                     | Interaction           |                               |                             | 6.473                          | <0.0001                  |                                    |                                                                                                                                                                                                                                           |                 |
| 16  | Fig. 2F, panel 1 | Two Way RM-ANOVA    | Group                 | (3,17)                        | F-statistic                 | 2.014                          | 0.1502                   |                                    |                                                                                                                                                                                                                                           | 3-7 mice        |
|     |                  |                     | Time                  |                               |                             | 1.685                          | 0.1191                   |                                    |                                                                                                                                                                                                                                           |                 |
|     |                  |                     | Interaction           |                               |                             | 1                              | 0.7516                   |                                    |                                                                                                                                                                                                                                           |                 |
| 17  | Fig. 2F, panel 2 | Two Way RM-ANOVA    | Group                 | (3,17)                        | F-statistic                 | 0.6155                         | 0.6143                   |                                    |                                                                                                                                                                                                                                           | 3-7 mice        |
|     |                  |                     | Time                  |                               |                             | 23.36                          | <0.0001                  |                                    |                                                                                                                                                                                                                                           |                 |
|     |                  |                     | Interaction           |                               |                             | 0.8446                         | 0.6605                   |                                    |                                                                                                                                                                                                                                           |                 |
| 18  | Fig. 2F, panel 3 | Two Way RM-ANOVA    | Group                 | (3, 17)                       | F-statistic                 | 0.4326                         | 0.7324                   |                                    |                                                                                                                                                                                                                                           | 3-7 mice        |
|     |                  |                     | Time                  |                               |                             | 1.404                          | 0.2312                   |                                    |                                                                                                                                                                                                                                           |                 |
|     |                  |                     | Interaction           |                               |                             | 0.6765                         | 0.8004                   |                                    |                                                                                                                                                                                                                                           |                 |
| 19  | Fig. 2F, panel 4 | Two Way RM-ANOVA    | Group                 | (3, 17)                       | F-statistic                 | 1.162                          | 0.353                    |                                    |                                                                                                                                                                                                                                           | 3-7 mice        |
|     |                  |                     | Time                  |                               |                             | 1.462                          | 0.2107                   |                                    |                                                                                                                                                                                                                                           |                 |
|     |                  |                     | Interaction           |                               |                             | 0.6521                         | 0.8229                   |                                    |                                                                                                                                                                                                                                           |                 |
| 20  | Fig. 2F, panel 5 | Two Way RM-ANOVA    | Group                 | (3, 17)                       | F-statistic                 | 7.78                           | 0.0017                   | Sidak: Trials                      | Trial 2: Res vs. Non 0.0479; Trial 4: Res vs. Non 0.0181                                                                                                                                                                                  | 3-7 mice        |
|     |                  |                     | Time                  |                               |                             | 0.9564                         | 0.4493                   |                                    |                                                                                                                                                                                                                                           |                 |
|     |                  |                     | Interaction           |                               |                             | 0.5976                         | 0.8691                   |                                    |                                                                                                                                                                                                                                           |                 |
| 21  | Fig. 2F, panel 6 | Unpaired t-test     | Group                 | (2, 18)                       | F-statistic                 | 1.254                          | 0.3615                   |                                    |                                                                                                                                                                                                                                           | 3-7 mice        |
| 22  | Fig. 2J          | Two Way RM ANOVA    | Group                 | (3, 17)                       | F-statistic                 | 0.2566                         | 0.4897                   |                                    |                                                                                                                                                                                                                                           |                 |
|     |                  |                     | Time                  |                               |                             | 0.6486                         | 0.6298                   |                                    |                                                                                                                                                                                                                                           |                 |
|     |                  |                     | Interaction           |                               |                             | 0.9656                         | 0.4897                   |                                    |                                                                                                                                                                                                                                           |                 |
|     |                  |                     | Group                 | (3, 17)                       |                             | 0.04281                        | 0.9878                   |                                    |                                                                                                                                                                                                                                           |                 |



| Row | Figure           | Statistical Model | Variable         | Degrees of Freedom (DFn, DFd) | Parameter(s) | Parameter value | p-value | Multiple comparisons? (Sidak test) | p-value                                           | n per group |
|-----|------------------|-------------------|------------------|-------------------------------|--------------|-----------------|---------|------------------------------------|---------------------------------------------------|-------------|
| 23  | Fig. 2K          | Two Way RM ANOVA  | Time             | (4, 68)                       | F-statistic  | 5.506           | 0.0007  |                                    |                                                   | 3-7 mice    |
|     |                  |                   | Interaction      | (12, 68)                      |              | 1.106           | 0.3109  |                                    |                                                   |             |
| 24  | Fig. 2L          | Two Way RM ANOVA  | Group            | (3, 17)                       | F-statistic  | 1.461           | 0.2606  |                                    |                                                   | 3-7 mice    |
|     |                  |                   | Time             | (4, 68)                       |              | 0.9682          | 0.4308  |                                    |                                                   |             |
|     |                  |                   | Interaction      | (12, 68)                      |              | 0.7331          | 0.7144  |                                    |                                                   |             |
| 25  | Fig. 2M          | Two Way RM ANOVA  | Group            | (3, 17)                       | F-statistic  | 0.2848          | 0.8357  |                                    |                                                   | 3-7 mice    |
|     |                  |                   | Time             | (4, 68)                       |              | 50.48           | <0.0001 |                                    |                                                   |             |
|     |                  |                   | Interaction      | (12, 68)                      |              | 1.534           | 0.1335  |                                    |                                                   |             |
| 26  | Fig. 2N          | Two Way RM ANOVA  | Group            | (3, 17)                       | F-statistic  | 0.2464          | 0.979   |                                    |                                                   | 3-7 mice    |
|     |                  |                   | Time             | (4, 68)                       |              | 110.3           | <0.0001 |                                    |                                                   |             |
|     |                  |                   | Interaction      | (12, 68)                      |              | 0.3381          | 0.8626  |                                    |                                                   |             |
| 27  | Fig. 2O          | Two Way RM ANOVA  | Group            | (3, 17)                       | F-statistic  | 0.7136          | 0.5573  |                                    |                                                   | 3-7 mice    |
|     |                  |                   | Time             | (4, 68)                       |              | 154.6           | <0.0001 |                                    |                                                   |             |
|     |                  |                   | Interaction      | (12, 68)                      |              | 0.6438          | 0.7974  |                                    |                                                   |             |
| 28  | Fig. 2P          | Two Way RM ANOVA  | Group            | (3, 17)                       | F-statistic  | 0.435           | 0.7308  |                                    |                                                   | 3-7 mice    |
|     |                  |                   | Time             | (2, 679, 45.54)               |              | 13.15           | <0.0001 |                                    |                                                   |             |
|     |                  |                   | Interaction      | (12, 68)                      |              | 1.213           | 0.2808  |                                    |                                                   |             |
| 29  | Fig. 3A, panel 1 | Two Way ANOVA     | Treatment        | (1, 17)                       | F-statistic  | 1.779           | 0.1998  |                                    |                                                   | 3-7 mice    |
|     |                  |                   | Extinction class | (1, 17)                       |              | 0.4785          | 0.4984  |                                    |                                                   |             |
|     |                  |                   | Interaction      | (1, 17)                       |              | 0.5428          | 0.4713  |                                    |                                                   |             |
| 30  | Fig. 3A, panel 2 | Two Way ANOVA     | Treatment        | (1, 17)                       | F-statistic  | 0.1064          | 0.7482  |                                    |                                                   | 3-7 mice    |
|     |                  |                   | Extinction class | (1, 17)                       |              | 0.4287          | 0.5214  |                                    |                                                   |             |
|     |                  |                   | Interaction      | (1, 17)                       |              | 3.734           | 0.0702  |                                    |                                                   |             |
| 31  | Fig. 3A, panel 3 | Two Way ANOVA     | Treatment        | (1, 17)                       | F-statistic  | 48.57           | <0.0001 | Sidak: Psil vs. Sal                | Rapid: <0.0001; Slow: 0.0004                      | 3-7 mice    |
|     |                  |                   | Extinction class | (1, 17)                       |              | 0.403           | 0.534   |                                    |                                                   |             |
|     |                  |                   | Interaction      | (1, 17)                       |              | 1.219           | 0.285   |                                    |                                                   |             |
| 32  | Fig. 3A, panel 4 | Two Way ANOVA     | Treatment        | (1, 17)                       | F-statistic  | 1.432           | 0.2479  |                                    |                                                   | 3-7 mice    |
|     |                  |                   | Extinction class | (1, 17)                       |              | 0.4266          | 0.5224  |                                    |                                                   |             |
|     |                  |                   | Interaction      | (1, 17)                       |              | 4.623           | 0.0462  | Sidak: Psil vs. Sal                | Slow psil v. slow sal: 0.0464                     |             |
| 33  | Fig. 3A, panel 5 | Two Way ANOVA     | Treatment        | (1, 17)                       | F-statistic  | 1.148           | 0.3473  |                                    |                                                   | 3-7 mice    |
|     |                  |                   | Extinction class | (1, 17)                       |              | 1.616           | 0.2207  |                                    |                                                   |             |
|     |                  |                   | Interaction      | (1, 17)                       |              | 1.148           | 0.299   |                                    |                                                   |             |
| 34  | Fig. 3B, panel 1 | Two Way ANOVA     | Treatment        | (1, 17)                       | F-statistic  | 3.335           | 0.0854  |                                    |                                                   | 3-7 mice    |
|     |                  |                   | Extinction class | (1, 17)                       |              | 0.4659          | 0.5041  |                                    |                                                   |             |
|     |                  |                   | Interaction      | (1, 17)                       |              | 1               | 0.2761  |                                    |                                                   |             |
| 35  | Fig. 3B, panel 2 | Two Way ANOVA     | Treatment        | (1, 17)                       | F-statistic  | 0.04985         | 0.826   |                                    |                                                   | 3-7 mice    |
|     |                  |                   | Extinction class | (1, 17)                       |              | 3.258           | 0.0888  |                                    |                                                   |             |
|     |                  |                   | Interaction      | (1, 17)                       |              | 0.6745          | 0.6745  |                                    |                                                   |             |
| 36  | Fig. 3B, panel 3 | Two Way ANOVA     | Treatment        | (1, 17)                       | F-statistic  | 14.97           | 0.0012  | sidak: psil v sal                  | rapid: 0.1184; slow: 0.0049                       | 3-7 mice    |
|     |                  |                   | Extinction class | (1, 17)                       |              | 0.07179         | 0.792   |                                    |                                                   |             |
|     |                  |                   | Interaction      | (1, 17)                       |              | 0.8108          | 0.3805  |                                    |                                                   |             |
| 37  | Fig. 3B, panel 4 | Two Way ANOVA     | Treatment        | (1, 17)                       | F-statistic  | 0               | 0.7698  |                                    |                                                   | 3-7 mice    |
|     |                  |                   | Extinction class | (1, 17)                       |              | 0.685           | 0.4193  |                                    |                                                   |             |
|     |                  |                   | Interaction      | (1, 17)                       |              | 0.0884          | 0.8432  |                                    |                                                   |             |
| 38  | Fig. 3B, panel 5 | Two Way ANOVA     | Treatment        | (1, 17)                       | F-statistic  | 0.002783        | 0.9585  |                                    |                                                   | 3-7 mice    |
|     |                  |                   | Extinction class | (1, 17)                       |              | 3.41            | 0.0823  |                                    |                                                   |             |
|     |                  |                   | Interaction      | (1, 17)                       |              | 3.41            | 0.0823  |                                    |                                                   |             |
| 39  | Fig. 3E, panel 1 | Two Way ANOVA     | Treatment        | (1, 17)                       | F-statistic  | 0.1006          | 0.755   |                                    |                                                   | 3-7 mice    |
|     |                  |                   | Extinction class | (1, 17)                       |              | 0.8545          | 0.3682  |                                    |                                                   |             |
|     |                  |                   | Interaction      | (1, 17)                       |              | 0.6187          | 0.4423  |                                    |                                                   |             |
| 40  | Fig. 3E, panel 2 | Two Way ANOVA     | Treatment        | (1, 17)                       | F-statistic  | 0.2706          | 0.054   |                                    |                                                   | 3-7 mice    |
|     |                  |                   | Extinction class | (1, 17)                       |              | 2.857           | 0.1092  |                                    |                                                   |             |
|     |                  |                   | Interaction      | (1, 17)                       |              | 4.285           | 0.6097  |                                    |                                                   |             |
| 41  | Fig. 3E, panel 3 | Two Way ANOVA     | Treatment        | (1, 17)                       | F-statistic  | 20.69           | 0.0003  |                                    |                                                   | 3-7 mice    |
|     |                  |                   | Extinction class | (1, 17)                       |              | 10.27           | 0.0052  |                                    |                                                   |             |
|     |                  |                   | Interaction      | (1, 17)                       |              | 9.196           | 0.0075  | Sidak                              | rapid sal v psil: 0.0002 sal rapid v slow: 0.0028 |             |
| 42  | Fig. 3E, panel 4 | Two Way ANOVA     | Treatment        | (1, 17)                       | F-statistic  | 0.08971         | 0.7682  |                                    |                                                   | 3-7 mice    |
|     |                  |                   | Extinction class | (1, 17)                       |              | 0.1562          | 0.6976  |                                    |                                                   |             |
|     |                  |                   | Interaction      | (1, 17)                       |              | 0.09206         | 0.7653  |                                    |                                                   |             |
| 43  | Fig. 3E, panel 5 | Two Way ANOVA     | Treatment        | (1, 17)                       | F-statistic  | 0.2325          | 0.6358  |                                    |                                                   | 3-7 mice    |
|     |                  |                   | Extinction class | (1, 17)                       |              | 7.921           | 0.0119  | Sidak: psil                        | rapid v slow: 0.0136                              |             |
|     |                  |                   | Interaction      | (1, 17)                       |              | 0.5108          | 0.6358  |                                    |                                                   |             |
| 44  | Fig. 3FF panel 1 | Two Way ANOVA     | Treatment        | (1, 17)                       | F-statistic  | 0.06716         | 0.1367  |                                    |                                                   | 3-7 mice    |
|     |                  |                   | Extinction class | (1, 17)                       |              | 0.01831         | 0.8939  |                                    |                                                   |             |
|     |                  |                   | Interaction      | (1, 17)                       |              | 2.401           | 0.7516  |                                    |                                                   |             |
| 45  | Fig. 3F, panel 2 | Two Way ANOVA     | Treatment        | (1, 17)                       | F-statistic  | 0.6654          | 0.4295  |                                    |                                                   | 3-7 mice    |
|     |                  |                   | Extinction class | (1, 17)                       |              | 0.1733          | 0.6824  |                                    |                                                   |             |
|     |                  |                   | Interaction      | (1, 17)                       |              | 6.323           | 0.0223  |                                    |                                                   |             |
| 46  | Fig. 3F, panel 3 | Two Way ANOVA     | Treatment        | (1, 17)                       | F-statistic  | 43.19           | <0.0001 | Sidak: rapid v slow                | sal; ,0081; psil; <0.0001                         | 3-7 mice    |
|     |                  |                   | Extinction class | (1, 17)                       |              | 1.651           | 0.2161  |                                    |                                                   |             |
|     |                  |                   | Interaction      | (1, 17)                       |              | 4.437           | 0.0503  |                                    |                                                   |             |
| 47  | Fig. 3F, panel 4 | Two Way ANOVA     | Treatment        | (1, 17)                       | F-statistic  | 1               | 0.527   |                                    |                                                   | 3-7 mice    |
|     |                  |                   | Extinction class | (1, 17)                       |              | 0.2496          | 0.6238  |                                    |                                                   |             |
|     |                  |                   | Interaction      | (1, 17)                       |              | 0.4172          | 0.4045  |                                    |                                                   |             |
|     |                  |                   | Treatment        | (1, 17)                       |              | 0.6719          | 0.4237  |                                    |                                                   |             |

| Row    | Figure             | Statistical Model          | Variable                                                                                | Degrees of Freedom (DFn, DFd) | Parameter(s)          | Parameter value                                                                                                                                                | p-value                                                     | Multiple comparisons? (Sidak test) | p-value                                            | n per group    |
|--------|--------------------|----------------------------|-----------------------------------------------------------------------------------------|-------------------------------|-----------------------|----------------------------------------------------------------------------------------------------------------------------------------------------------------|-------------------------------------------------------------|------------------------------------|----------------------------------------------------|----------------|
| 48     | Fig. 3F, panel 5   | Two Way ANOVA              | Extinction class                                                                        | (1,17)                        |                       | 0.458                                                                                                                                                          | 0.5077                                                      |                                    |                                                    | 3-7 mice       |
|        |                    |                            | Interaction                                                                             | (1,17)                        | F-statistic           | 1.523                                                                                                                                                          | 0.234                                                       |                                    |                                                    |                |
| 49     | Fig. 3G, top       | Linear regression          | PC distance during ext3 x freezing late ext3, psil                                      | (1,12)                        | F-statistic/Beta 0/R2 | 16.61 / -191.8±47.07 / 0.5805                                                                                                                                  | 0.0015                                                      |                                    |                                                    | 14 mice        |
| 50     | Fig. 3G, bottom    | Linear regression          | PC distance during ext3 x freezing late ext3, sal                                       | (1,5)                         | F-statistic/Beta 0/R2 | .6275 -100.5±126.9 / 0.1115                                                                                                                                    | 0.4642                                                      |                                    |                                                    | 7 mice         |
| 51     | Fig. 4B, panel 1   | Two Way RM ANOVA           | Sex                                                                                     | (3, 17)                       |                       | 0.4119                                                                                                                                                         | 0.7465                                                      |                                    |                                                    | 7 mice         |
|        |                    |                            | Time                                                                                    | (33, 561)                     |                       | 14.28                                                                                                                                                          | <0.0001                                                     |                                    |                                                    |                |
|        |                    |                            | Interaction                                                                             | (99, 561)                     | F-statistic           | 0.7388                                                                                                                                                         | 0.9684                                                      |                                    |                                                    |                |
| 52     | Fig. 4B, panel 2   | Two Way RM ANOVA           | Sex                                                                                     | (3, 17)                       |                       | 6.775                                                                                                                                                          | 0.0033                                                      |                                    |                                                    | 7 mice         |
|        |                    |                            | Time                                                                                    | (33, 561)                     |                       | 11.96                                                                                                                                                          | <0.0001                                                     |                                    |                                                    |                |
|        |                    |                            | Interaction                                                                             | (99, 561)                     | F-statistic           | 1.27                                                                                                                                                           | 0.0515                                                      |                                    |                                                    |                |
| 53     | Fig. 4B, panel 3   | Two Way RM ANOVA           | Sex                                                                                     | (3, 17)                       |                       | 1.71                                                                                                                                                           | 0.2029                                                      |                                    |                                                    | 7 mice         |
|        |                    |                            | Time                                                                                    | (33, 561)                     |                       | 9.227                                                                                                                                                          | <0.0001                                                     |                                    |                                                    |                |
|        |                    |                            | Interaction                                                                             | (99, 561)                     | F-statistic           | 1.71                                                                                                                                                           | 0.3224                                                      |                                    |                                                    |                |
| 54     | Fig. 4B, panel 4   | Two Way RM ANOVA           | Sex                                                                                     | (3, 17)                       |                       | 1.46                                                                                                                                                           | 0.2609                                                      |                                    |                                                    | 7 mice         |
|        |                    |                            | Time                                                                                    | (33, 561)                     |                       | 19.95                                                                                                                                                          | <0.0001                                                     |                                    |                                                    |                |
|        |                    |                            | Interaction                                                                             | (99, 561)                     | F-statistic           | 1.125                                                                                                                                                          | 0.2092                                                      |                                    |                                                    |                |
| 55     | Fig. 34, panel 5   | Two Way RM ANOVA           | Sex                                                                                     | (3, 17)                       |                       | 0.5065                                                                                                                                                         | 0.583                                                       |                                    |                                                    | 7 mice         |
|        |                    |                            | Time                                                                                    | (33, 561)                     |                       | 17.3                                                                                                                                                           | <0.0001                                                     |                                    |                                                    |                |
|        |                    |                            | Interaction                                                                             | (99, 561)                     | F-statistic           | 1.333                                                                                                                                                          | 0.025                                                       |                                    |                                                    |                |
| 56     | Fig. 4C, solid     | Ordinary One-Way ANOVA     | Group                                                                                   | (3,17)                        | F-statistic           | 0.3857                                                                                                                                                         | 1                                                           |                                    |                                                    | 7 mice         |
| 57     | Fig. 4C, checked   | Ordinary One-Way ANOVA     | Group                                                                                   | (3,17)                        | F-statistic           | 0.7163                                                                                                                                                         | 0.5558                                                      |                                    |                                                    | 7 mice         |
| 58     | Fig. 4D            | Multiple unpaired t-tests  | Dateset (real vs. shuffled)                                                             | 198                           | t-statistic           | 144.1; 115.9; 25.21; 38.53                                                                                                                                     | <0.0001; <0.0001; <0.0001; <0.0001                          |                                    |                                                    | 100 iterations |
| 59     | Fig. 4E - data for | Multiple linear regression | Component trial factor weight X trial by trial freezing                                 |                               | F-statistic/R2        | for each animal (res, nonres, rapid, slow):                                                                                                                    | for each animal (res, nonres, sal):                         |                                    |                                                    | 21 mice        |
|        |                    |                            |                                                                                         |                               |                       | 24.2871                                                                                                                                                        | 0                                                           |                                    |                                                    |                |
|        |                    |                            |                                                                                         |                               |                       | 0.8126                                                                                                                                                         | 0                                                           |                                    |                                                    |                |
|        |                    |                            |                                                                                         |                               |                       | 7.262                                                                                                                                                          | 0.5646                                                      |                                    |                                                    |                |
|        |                    |                            |                                                                                         |                               |                       | 10.0595                                                                                                                                                        | 0.6424                                                      |                                    |                                                    |                |
|        |                    |                            |                                                                                         |                               |                       | 2.7637                                                                                                                                                         | 0.3304                                                      |                                    |                                                    |                |
|        |                    |                            |                                                                                         |                               |                       | 5.1204                                                                                                                                                         | 0.4776                                                      |                                    |                                                    |                |
|        |                    |                            |                                                                                         |                               |                       | 6.6871                                                                                                                                                         | 0.5442                                                      |                                    |                                                    |                |
|        |                    |                            |                                                                                         |                               |                       | 4.7136                                                                                                                                                         | 0.457                                                       |                                    |                                                    |                |
|        |                    |                            |                                                                                         |                               |                       | 8.9874                                                                                                                                                         | 0.6161                                                      |                                    |                                                    |                |
|        |                    |                            |                                                                                         |                               |                       | 5.2324                                                                                                                                                         | 0.483                                                       |                                    |                                                    |                |
|        |                    |                            |                                                                                         |                               |                       | 3.8343                                                                                                                                                         | 0.4064                                                      |                                    |                                                    |                |
|        |                    |                            |                                                                                         |                               |                       | 5.7258                                                                                                                                                         | 0.5056                                                      |                                    |                                                    |                |
|        |                    |                            |                                                                                         |                               |                       | 1.7432                                                                                                                                                         | 0.2374                                                      |                                    |                                                    |                |
|        |                    |                            |                                                                                         |                               |                       | 8.4946                                                                                                                                                         | 0.6027                                                      |                                    |                                                    |                |
|        |                    |                            |                                                                                         |                               |                       | 4.3268                                                                                                                                                         | 0.4359                                                      |                                    |                                                    |                |
|        |                    |                            |                                                                                         |                               |                       | 3.2644                                                                                                                                                         | 0.3683                                                      |                                    |                                                    |                |
| 5.7293 | 0.5057             |                            |                                                                                         |                               |                       |                                                                                                                                                                |                                                             |                                    |                                                    |                |
| 4.2004 | 0.4286             |                            |                                                                                         |                               |                       |                                                                                                                                                                |                                                             |                                    |                                                    |                |
| 3.3388 | 0.3735             |                            |                                                                                         |                               |                       |                                                                                                                                                                |                                                             |                                    |                                                    |                |
| 3.1072 | 0.3569             |                            |                                                                                         |                               |                       |                                                                                                                                                                |                                                             |                                    |                                                    |                |
| 2.0108 | 0.2642             |                            |                                                                                         |                               |                       |                                                                                                                                                                |                                                             |                                    |                                                    |                |
| 2.4635 | 0.3055             |                            |                                                                                         |                               |                       |                                                                                                                                                                |                                                             |                                    |                                                    |                |
| 60     | Fig. 4E            | One sample t-test          | Median correlation between component trial factor: weight X trial by trial freezing > 0 | 6; 6; 2; 3                    | t-statistic           | res: 29.481/ non-res: 9.638/ rapid: 13.05; slow = 10.92                                                                                                        | res: <0.0001; non-res: <0.0001; rapid: 0.0083; slow: 0.0081 |                                    |                                                    |                |
| 61     | Fig. 4F, column 1  | Linear regression          | Strength of component in session X extinction rate                                      | (1,19)                        | F-statistic/Beta 0/R2 | H: 0.6973 / -0.07817 / 0.03540; A: 0.4962, / 0.05690 / 0.02545; E1 0.6020 / 0.05855 / 0.03071; E2: 0.1427/ 0.01963 / 0.007452; E3: 0.4347 / 0.04096 / 0.02237  | H: 0.4141, A: 0.4897, E1: 0.4474, E2: 0.7098, E3 0.5176     |                                    |                                                    | 21 mice        |
|        |                    |                            |                                                                                         |                               |                       | 62                                                                                                                                                             | Fig. 4F, column 2                                           | Linear regression                  | Strength of component in session X extinction rate |                |
| 63     | Fig. 4F, column 3  | Linear regression          | Strength of component in session X extinction rate                                      | (1,19)                        | F-statistic/Beta 0/R2 | H: 0.1744 / -0.03684/ 0.009095; A: 0.4962, / -0.02452 / 0.005961; E1 2.394 / -0.1309 / 0.1119; E2: 0.2255/ -0.0564 / 0.01173; E3: 0.04184 /-0.02214 / 0.002197 | H: 0.6809, A: 0.7394, E1: 0.1383, E2: 0.8403, E3 0.8401     |                                    |                                                    | 21 mice        |

| Row | Figure            | Statistical Model | Variable                                                     | Degrees of Freedom (DFn, DFd) | Parameter(s)          | Parameter value                                                                                                                                                | p-value                                                                       | Multiple comparisons? (Sidak test)      | p-value                                                                                                                              | n per group                                    |
|-----|-------------------|-------------------|--------------------------------------------------------------|-------------------------------|-----------------------|----------------------------------------------------------------------------------------------------------------------------------------------------------------|-------------------------------------------------------------------------------|-----------------------------------------|--------------------------------------------------------------------------------------------------------------------------------------|------------------------------------------------|
| 64  | Fig. 4F, column 4 | Linear regression | Strength of component in session X extinction rate           | (1,19)                        | F-statistic/Beta 0/R2 | H: 2.029 / 0.1275 / 0.0965; A: 0.03238, / -0.01209 0.001701; E1 0.006821 / -0.008477 / 0.0003589; E2: 5.533 / -0.1994 / 0.2255; E3: 0.2794 / 0.03526 / 0.01449 | H: 0.1705, A: 0.8591, E1: 0.935, E2: 0.0296, E3 0.6032                        |                                         |                                                                                                                                      | 21 mice                                        |
| 65  | Fig. 4F, column 5 | Linear regression | Strength of component in session X extinction rate           | (1,19)                        | F-statistic/Beta 0/R2 | H: 0.06392 / 0.02579 / 0.003353; A: 2.43, / 0.07323 / 0.1134; E1 0.218 / 0.05245 / 0.01134; E2: 0.9223 / 0.0414 / 0.0463; E3: 10.8 / -0.2158 / 0.3624          | H: 0.8031, A: 0.1355, E1: 0.6459, E2: 0.3489, E3 0.0039                       |                                         |                                                                                                                                      | 21 mice                                        |
| 66  | Fig. 4G           | Linear regression | Component strength X extinction rate                         | (1,19)                        | F-statistic/Beta 0/R2 | 11.74 / -1.579±0.4607 / 0.3820                                                                                                                                 | 0.0028                                                                        |                                         |                                                                                                                                      | 21 mice                                        |
| 67  | Fig. 5B, top      | Chi-square        | Extinction class                                             |                               | 3 Chi-square          | 85.29                                                                                                                                                          | <0.0001                                                                       |                                         |                                                                                                                                      | 3-4 mice                                       |
| 68  | Fig. 5B, middle   | Chi-square        | Extinction class                                             |                               | 3 Chi-square          | 78.29                                                                                                                                                          | <0.0001                                                                       |                                         |                                                                                                                                      | 3-4 mice                                       |
| 69  | Fig. 5B, bottom   | Chi-square        | Extinction class                                             |                               | 3 Chi-square          | 73.77                                                                                                                                                          | <0.0001                                                                       |                                         |                                                                                                                                      | 3-4 mice                                       |
| 70  | Fig. 5C           | Linear regression | Fraction of Acq/Ext1/Ext3 neurons x extinction rate, saline  | (1, 5)                        | F-statistic/Beta 0/R2 | 11.66/1.119 ± .3275/0.6999                                                                                                                                     | 0.0189                                                                        |                                         |                                                                                                                                      | 7 mice                                         |
| 71  | Fig. 5D, top      | Wilcoxon rank-sum | Median # 0                                                   |                               | Sum of signed ranks   | Rap 1 -1004; Rap3 1576; Slo1 28; Slo3 152                                                                                                                      | .0001; <0.0001; .6215; .0032                                                  |                                         |                                                                                                                                      | 60 neurons (Rap), 20 (Slow)                    |
| 72  | Fig. 5D, bottom   | Two-Way RM ANOVA  | Extinction class (1,78)<br>Time (1,78)<br>Interaction (1,78) |                               | Two-Way RM ANOVA      | 0.6696 0.4157<br>21.95 <0.0001<br>8.879 0.0038                                                                                                                 |                                                                               | Sidak<br>Rapid: <0.0001<br>Ext3: 0.0342 |                                                                                                                                      | 60 (Rap), 20(slow)                             |
| 73  | Fig. 5E, top      | Wilcoxon rank-sum | Median # 0                                                   |                               | Sum of signed ranks   | Rap 1 189; Rap3 -89; Slo1 -384; Slo3 -388                                                                                                                      | 0.0013; .1560; .1430; .1250                                                   |                                         |                                                                                                                                      | 22 (rap), . 34 (slow)                          |
| 74  | Fig. 5E, bottom   | Two-Way RM ANOVA  | Extinction class (1,54)<br>Time (1,54)<br>Interaction (1,54) |                               | Two-Way RM ANOVA      | 5.533 0.0223<br>35.24 <0.0001<br>27.85 <0.0001                                                                                                                 |                                                                               | Sidak<br>Sidak<br>Rapid: <0.0001        |                                                                                                                                      | 22 (rap), . 34 (slow)                          |
| 75  | Fig. 5F, top      | Wilcoxon rank-sum | Median # 0                                                   |                               | Sum of signed ranks   | Rap 1 48.00; Rap3 102; Slo1 371; Slo3 -233                                                                                                                     | 0.2312; 1.0063; 0.0359; 0.001                                                 |                                         |                                                                                                                                      | 16 neurons (Rap), 45 (Slow)                    |
| 76  | Fig. 5F, bottom   | Two-Way RM ANOVA  | Extinction class (1,59)<br>Time (1,59)<br>Interaction (1,59) |                               | Two-Way RM ANOVA      | 2.34 0.1314<br>11.56 0.0012<br>1.994 0.1632                                                                                                                    |                                                                               | Sidak<br>Rapid: 0.0137                  |                                                                                                                                      | 16 neurons (Rap), 45 (Slow)                    |
| 77  | Fig. 6B, top      | Chi-square        | Group                                                        |                               | 3 Chi-square          | Res vs. Sal: 19.09; Res v Nonres: 6.433; Nonres v sal: 12.04                                                                                                   | Res vs. Sal 0.0003, Res v nonres: 0.0823; Nonres v sal: 0.0072                |                                         |                                                                                                                                      | 3-7 mice                                       |
| 78  | Fig. 6B, middle   | Chi-square        | Group                                                        |                               | 3 Chi-square          | Res vs. Sal:5.470; Res v Nonres: 2.487; Nonres v sal: 32.49                                                                                                    | Res vs. Sal 0.1404, Res v nonres: 0.4776; Nonres v sal: 0.0089                |                                         |                                                                                                                                      | 3-7 mice                                       |
| 79  | Fig. 6B, bottom   | Chi-square        | Group                                                        |                               | 3 Chi-square          | Res vs. Sal: 16.25; Res v Nonres: .2203; Nonres v sal: 33.49                                                                                                   | Res vs. Sal 0.001, Res v nonres: 0.9473; Nonres v sal: 0.0004                 |                                         |                                                                                                                                      | 3-7 mice                                       |
| 80  | Fig. 6C, top      | Wilcoxon rank-sum | Median = 0                                                   |                               | sum of signed ranks   | R1: -1849, R3: -1794, N1 -1415, N3 -1173, S1 -151, S3 -123                                                                                                     | R1 <0.0001, R3 <0.0001, N1 <0.0001, N3 <0.0001, S1 <0.0001, S3 0.0021         |                                         |                                                                                                                                      | 63 neurons (R), 53 neurons (N), 17 neurons (S) |
| 81  | Fig. 6C, bottom   | Two Way RM ANOVA  | Group (2, 130)<br>Time (1, 130)<br>Interaction (2, 130)      |                               | F-statistic           | 4.734<br>2.965<br>0.01344                                                                                                                                      | 0.0104<br>0.0875<br>0.9866                                                    | Sidak: Ext1, Ext3                       | Ext1: Res vs. Non 0.0155; Res vs. Sal 0.9998; Non vs. Sal 0.1974<br>Ext3: Res vs. Non 0.0199; Res vs. Sal 0.9992; Non vs. Sal 0.2398 | 63 neurons (R), 53 neurons (N), 17 neurons (S) |
| 82  | Fig. 6D, top      | Wilcoxon rank-sum | Median = 0                                                   |                               | sum of signed ranks   | R1: 493, R3: 489, N1 754, N3 326, S1 183, S3 5                                                                                                                 | R1 0.0010, R3 0.0011, N1 <0.0001, N3 <0.0001, S1 0.0856, S3 0.0007, S3 0.9383 |                                         |                                                                                                                                      | 41 neurons (R), 47 neurons (N), 21 neurons (S) |
| 83  | Fig. 6D, bottom   | Two Way RM ANOVA  | Group (2, 106)<br>Time (1, 106)<br>Interaction (2, 106)      |                               | F-statistic           | 1.845<br>20.77<br>1.961                                                                                                                                        | 0.163<br>0.0104<br>0.9866                                                     | Sidak: Res, Non-Res, Sal                | Res: Ext1 vs. Ext3 0.0488; Non: Ext1 vs. Ext3 0.2563; Sal: Ext1 vs. Ext3 0.0020                                                      | 41 neurons (R), 47 neurons (N), 21 neurons (S) |

| Row | Figure          | Statistical Model | Variable    | Degrees of Freedom (DFn, DfD) | Parameter(s)        | Parameter value                                                                | p-value                                                                                        | Multiple comparisons? (Sidak test) | p-value                                                                                                                 | n per group                                                           |
|-----|-----------------|-------------------|-------------|-------------------------------|---------------------|--------------------------------------------------------------------------------|------------------------------------------------------------------------------------------------|------------------------------------|-------------------------------------------------------------------------------------------------------------------------|-----------------------------------------------------------------------|
| 84  | Fig. 6E, top    | Wilcoxon rank-sum | Median = 0  |                               | sum of signed ranks | R1: 28, R3: 1784, N1 355, N3 941, S1 -1004, S3 1576                            | R1 0.9214, R3 <0.0001, N1 0.0525, N3 <0.0001, S1 <0.0001, S3 <0.0001                           |                                    |                                                                                                                         | 60 neurons (R), 46 neurons (N), 60 neurons (S)                        |
| 85  | Fig. 6E, bottom | Two Way RM ANOVA  | Group       | (1, 163)                      |                     | 5.424                                                                          | 0.0052                                                                                         | Ext1, Ext3                         | Ext3: Res vs. Non <0.0001; Res vs. Sal 0.0039; Sal v non .3349                                                          | 60 neurons (R), 46 neurons (N), 60 neurons (S)                        |
|     |                 |                   | Time        | (2, 163)                      |                     | 112.4                                                                          | <0.0001                                                                                        | Res, Non-Res, Sal                  | Res: <0.0001; Non: 0.0083; Sal: <0.0001                                                                                 |                                                                       |
| 86  | Fig. 6F, top    | Wilcoxon rank-sum | Median = 0  |                               | sum of signed ranks | R1: -307, R3: -465, N1 -48, N3 -328, S1 189, S3 -89                            | R1 0.0077, R3 <0.0001, N1 0.5979, N3 <0.0001, S1 0.156, S3 <0.0001                             |                                    |                                                                                                                         | 34 neurons (R), 28 neurons (N), 22 neurons (S)                        |
|     |                 |                   | Group       | (2, 81)                       |                     | 6.869                                                                          | 0.0004                                                                                         | Ext1, Ext3                         | Ext1: Res v npr: Res vs. Sal <0.0001; Non vs. Sal <0.0001                                                               | 34 neurons (R), 28 neurons (N), 22 neurons (S)                        |
| 87  | Fig. 6F, bottom | Two Way RM ANOVA  | Time        | (1, 81)                       |                     | 22.41                                                                          | <0.0001                                                                                        | Res, Non-Res, Sal                  | Res Ext1 vs. Ext3: 0.0744; Non: Ext1 vs. Ext3 0.0136 Sal: Ext1 vs. Ext3 <0.0001                                         |                                                                       |
|     |                 |                   | Interaction | (2, 81)                       | F-statistic         | 0.6691                                                                         | <0.0001                                                                                        |                                    |                                                                                                                         |                                                                       |
| 88  | Fig. 6G, top    | Wilcoxon rank-sum | Median = 0  |                               | sum of signed ranks | R1: -210, R3: 16, N1 -187, N3 -19, S1 -119, S3 31                              | R1 <0.0001, R3 0.0049, N1 0.0005, N3 0.7593, S1 0.4235, S3 0.4874                              |                                    |                                                                                                                         | 20 neurons (R), 21 neurons (N), 17 neurons (S)                        |
|     |                 |                   | Group       | (2, 81)                       |                     | 8.81                                                                           | 0.5472                                                                                         | Ext1, Ext3                         | Res: Ext1 vs. Ext3 <0.0001; Non: Ext1 vs. Ext3 0.0364; Sal: Ext1 vs. Ext3 <0.0001                                       | 20 neurons (R), 21 neurons (N), 17 neurons (S)                        |
| 89  | Fig. 6G, bottom | Two Way RM ANOVA  | Time        | (1, 81)                       |                     | 75.07                                                                          | <0.0001                                                                                        | Res, Non-Res, Sal                  | Ext3 Res vs. Non: 0.0057                                                                                                |                                                                       |
|     |                 |                   | Interaction | (2, 81)                       | F-statistic         | 0.6069                                                                         | 0.0005                                                                                         |                                    |                                                                                                                         |                                                                       |
| 90  | Fig. 6H, top    | Wilcoxon rank-sum | Median = 0  |                               | sum of signed ranks | R1: 693, R3: 1035, N1 368, N3 490, S1 93, S3 93                                | R1 <0.0001, R3 <0.0001, N1 0.0003, N3 <0.0001, S1 0.4016, S3 0.0016                            |                                    |                                                                                                                         | 45 neurons (R), 32 neurons (N), 14 neurons (S)                        |
|     |                 |                   | Group       | (2, 55)                       |                     | 3.698                                                                          | 0.0287                                                                                         | Ext1, Ext3                         | Non vs. Sal 0.0134                                                                                                      | 45 neurons (R), 32 neurons (N), 14 neurons (S)                        |
| 91  | Fig. 6H, bottom | Two Way RM ANOVA  | Time        | (1, 55)                       |                     | 0.9934                                                                         | 0.3216                                                                                         | Res, Non-Res, Sal                  |                                                                                                                         |                                                                       |
|     |                 |                   | Interaction | (2, 55)                       | F-statistic         | 0.9202                                                                         | 0.4022                                                                                         |                                    |                                                                                                                         |                                                                       |
| 92  | Fig. 6I, top    | Wilcoxon rank-sum | Median = 0  |                               | sum of signed ranks | R1: -165, R3: 69, N1 265, N3 263, S1 48, S3 102                                | R1 0.0255, R3 0.3666, N1 0.0032, N3 0.0035, S1 0.2312, S3 0.0063                               |                                    |                                                                                                                         | 25 neurons (R), 29 neurons (N), 16 neurons (S))                       |
|     |                 |                   | Group       | (2, 112)                      |                     | 5.609                                                                          | <0.0001                                                                                        | Ext1, Ext3                         | Ext1: Res vs. Non 0.0156; Res vs. Sal 0.0178 Ext3: Res vs. Sal 0.0086                                                   | 25 neurons (R), 29 neurons (N), 16 neurons (S)                        |
| 93  | Fig. 6I, bottom | Two Way RM ANOVA  | Time        | (1, 112)                      |                     | 16.18                                                                          | 0.0038                                                                                         | Res, Non-Res, Sal                  | Res: Ext1 vs. Ext3 0.002; Sal: Ext1 vs. Ext3 0.0039                                                                     |                                                                       |
|     |                 |                   | Interaction | (2, 112)                      | F-statistic         | 0.9663                                                                         | 0.0788                                                                                         |                                    |                                                                                                                         |                                                                       |
| 94  | Fig. 7B, top    | Wilcoxon rank-sum | Median = 0  |                               | sum of signed ranks | R1: -8126, R3: -4531, N1 -3852, N3 -2972, SR1 -422, SR3 -324, SS1 194, SS3 548 | R1 <0.0001, R3 <0.0001, N1 <0.0001, N3 0.0006, SR1 0.3670, SR3 0.3690, SS1 0.6390, SS3 0.1824  |                                    |                                                                                                                         | 145 neurons (R), 128 neurons (N), 72 neurons (Rap), 79 neurons (Slow) |
|     |                 |                   | Group       | (3, 420)                      |                     | 12.99                                                                          | <0.0001                                                                                        | Ext1, Ext3                         | Ext1: Res vs. Non 0.0003; Res vs. Rapid <0.0001; Res vs. Slow <0.0001; Ext3: Res vs. Rapid 0.0052; Res vs. Slow 0.0004; | 145 neurons (R), 128 neurons (N), 72 neurons (Rap), 79 neurons (Slow) |
| 95  | Fig. 7B, bottom | Two Way RM ANOVA  | Time        | (1, 420)                      |                     | 5.524                                                                          | 0.0192                                                                                         | Res, Non-Res, Sal                  |                                                                                                                         |                                                                       |
|     |                 |                   | Interaction | (3, 420)                      | F-statistic         | 1.178                                                                          | 0.1625                                                                                         |                                    |                                                                                                                         |                                                                       |
| 96  | Fig. 7C, top    | Wilcoxon rank-sum | Median = 0  |                               | sum of signed ranks | R1: 2229, R3: 4645, N1 4941, N3 2719, SR1 2192, SR3 1483, SS1 194, SS3 548     | R1 0.0276, R3 <0.0001, N1 <0.0001, N3 <0.0001, SR1 0.0001, SR3 0.0001, SS1 0.6390, SS3 0.6390, |                                    |                                                                                                                         | 145 neurons (R), 137 neurons (N), 73 neurons (Rap), 79 neurons (Slow) |
|     |                 |                   | Group       | (3, 426)                      |                     | 8.33                                                                           | <0.0001                                                                                        | Ext1, Ext3                         | Ext1: Res v Rap: 0.0003; Non v Rap: 0.0062; Rap v Slow: <0.0001                                                         | 145 neurons (R), 137 neurons (N), 73 neurons (Rap), 79 neurons (Slow) |
| 97  | Fig. 7C, bottom | Two Way RM ANOVA  | Time        | (1, 426)                      |                     | 0.9501                                                                         | 0.3302                                                                                         | Res, Non-Res, Sal                  |                                                                                                                         |                                                                       |
|     |                 |                   | Interaction | (3, 426)                      | F-statistic         | 1.251                                                                          | 0.2909                                                                                         |                                    |                                                                                                                         |                                                                       |
| 98  | Fig. 7D, top    | Wilcoxon rank-sum | Median = 0  |                               | sum of signed ranks | R1: 157, R3: 9921, N1 2606, N3 5870, S1 -1279, S3 5038, S1 1339, S3 1129       | R1 0.8840, R3 <0.0001, N1 0.0018, N3 <0.0001, S1 0.0407, S3 <0.0001, S1 0.0821, S3 <0.0002     |                                    |                                                                                                                         | 145 neurons (R), 137 neurons (N), 105 neurons (Rap), 65 (Slow)        |
|     |                 |                   | Group       | (2, 390)                      |                     | 8.085                                                                          | <0.0001                                                                                        | Ext1, Ext3                         | Ext3: Res vs. Non <0.0001; Res vs. Rap 0.0365; Res v Slow: <0.0001; Non v Rap: 0.0116; Rap v slow: 0.0003               |                                                                       |

| Row | Figure                | Statistical Model | Variable                                                                          | Degrees of Freedom (DFn, DFD) | Parameter(s)          | Parameter value           | p-value | Multiple comparisons? (Sidak test) | p-value                                                                                  | n per group                                                    |
|-----|-----------------------|-------------------|-----------------------------------------------------------------------------------|-------------------------------|-----------------------|---------------------------|---------|------------------------------------|------------------------------------------------------------------------------------------|----------------------------------------------------------------|
| 99  | Fig. 7D, bottom       | Two Way RM ANOVA  | Time                                                                              | (1, 390)                      |                       | 136.5                     | <0.0001 | Res, Non-Res, Sal                  | Res: Ext1 vs. Ext3 <0.0001;<br>Non: Ext1 vs. Ext3 <0.0001;<br>Sal: Ext1 vs. Ext3 <0.0001 | 145 neurons (R), 137 neurons (N), 105 neurons (Rap), 65 (Slow) |
|     |                       |                   | Interaction                                                                       | (2, 390)                      | F-statistic           | 8.3                       | <0.0001 |                                    |                                                                                          |                                                                |
| 100 | Fig. 7E               | Linear regression | Activity of shock responsive Acq dom neurons x freezing late Ext3 psil            | (1, 12)                       | F-statistic/Beta 0/R2 | 7.3591/24.27±8.947/0.3801 | 0.0189  |                                    |                                                                                          | 7 mice                                                         |
| 101 | Fig. 7F               | Linear regression | Activity of nonoverlapping shock responsive Ext3-dom neurons x freezing late ext3 | (1, 12)                       | F-statistic/Beta 0/R2 | 15.47/-16.58±4.214/0.5632 | 0.0002  |                                    |                                                                                          | 21 mice                                                        |
| 102 | Supp Fig. 1A panel 1  | Two Way RM ANOVA  | Treatment                                                                         | (1, 50)                       |                       | 2.165                     | 0.1474  |                                    |                                                                                          | 22 psil, 29 sal                                                |
|     |                       |                   | Time                                                                              | (7, 350)                      |                       | 0.6103                    | 0.7475  |                                    |                                                                                          |                                                                |
|     |                       |                   | Interaction                                                                       | (7, 350)                      | F-statistic           | 0.6835                    | 0.686   |                                    |                                                                                          |                                                                |
| 103 | Supp Fig. 1A panel 2  | Two Way RM ANOVA  | Treatment                                                                         | (1, 50)                       |                       | 2.939                     | 0.0525  |                                    |                                                                                          | 22 psil, 29 sal                                                |
|     |                       |                   | Time                                                                              | (7, 350)                      |                       | 155.8                     | <0.0001 |                                    |                                                                                          |                                                                |
|     |                       |                   | Interaction                                                                       | (7, 350)                      | F-statistic           | 0.6591                    | 0.7067  |                                    |                                                                                          |                                                                |
| 104 | Supp Fig. 1A panel 3  | Two Way RM ANOVA  | Treatment                                                                         | (1, 50)                       |                       | 4.161                     | 0.0467  |                                    | Trial 3: 0.0359, Trial 4: 0.0354                                                         | 22 psil, 29 sal                                                |
|     |                       |                   | Time                                                                              | (7, 350)                      |                       | 7.14                      | <0.0001 |                                    |                                                                                          |                                                                |
|     |                       |                   | Interaction                                                                       | (7, 350)                      | F-statistic           | 2.289                     | 0.0465  |                                    |                                                                                          |                                                                |
| 105 | Supp Fig. 1A panel 4  | Two Way RM ANOVA  | Treatment                                                                         | (1, 50)                       |                       | 5.199                     | 0.016   | Trials                             | Sal vs. Psil: Trial 2: 0.0182, Trial 4: 0.0217                                           | 22 psil, 29 sal                                                |
|     |                       |                   | Time                                                                              | (7, 350)                      |                       | 2.067                     | 0.0701  |                                    |                                                                                          |                                                                |
|     |                       |                   | Interaction                                                                       | (7, 350)                      | F-statistic           | 2.848                     | 0.0269  |                                    |                                                                                          |                                                                |
| 106 | Supp Fig. 1A panel 5  | Two Way RM ANOVA  | Treatment                                                                         | (1, 50)                       |                       | 1.318                     | 0.1581  |                                    |                                                                                          | 22 psil, 29 sal                                                |
|     |                       |                   | Time                                                                              | (7, 350)                      |                       | 3.6585                    | 0.0035  |                                    |                                                                                          |                                                                |
|     |                       |                   | Interaction                                                                       | (7, 350)                      | F-statistic           | 0.5474                    | 0.5562  |                                    |                                                                                          |                                                                |
| 107 | Supp Fig. 1B          | Two Way RM ANOVA  | Sex                                                                               | (1, 27)                       |                       | 0.1026                    | 0.7512  |                                    |                                                                                          | 7-18 mice                                                      |
|     |                       |                   | Time                                                                              | (27, 243)                     |                       | 28.88                     | <0.0001 |                                    |                                                                                          |                                                                |
|     |                       |                   | Interaction                                                                       | (27, 243)                     | F-statistic           | 1.034                     | 0.4132  |                                    |                                                                                          |                                                                |
| 108 | Supp Fig. 1C          | Two Way RM ANOVA  | Sex                                                                               | (1, 20)                       |                       | 0.4265                    | 0.5211  |                                    |                                                                                          | 7-18 mice                                                      |
|     |                       |                   | Time                                                                              | (9, 180)                      |                       | 42.41                     | <0.0001 |                                    |                                                                                          |                                                                |
|     |                       |                   | Interaction                                                                       | (9, 180)                      | F-statistic           | 0.6221                    | 0.7772  |                                    |                                                                                          |                                                                |
| 109 | Supp Fig. 1D          | Two Way RM ANOVA  | Treatment                                                                         | (1, 4)                        |                       | 0.1253                    | 0.7412  |                                    |                                                                                          | 9-17 mice                                                      |
|     |                       |                   | Time                                                                              | (9, 36)                       |                       | 4.254                     | 0.008   |                                    |                                                                                          |                                                                |
|     |                       |                   | Interaction                                                                       | (9, 36)                       | F-statistic           | 1.457                     | 0.2355  |                                    |                                                                                          |                                                                |
| 110 | Supp Fig. 1E          | Two Way RM ANOVA  | Treatment                                                                         | (1, 49)                       |                       | 1.39                      | 0.2441  | Baseline vs. trace                 | Sal: <0.0001; Psil 0.0160                                                                | 7-18 mice                                                      |
|     |                       |                   | Time                                                                              | (1, 49)                       |                       | 23.67                     | <0.0001 |                                    |                                                                                          |                                                                |
|     |                       |                   | Interaction                                                                       | (1, 49)                       | F-statistic           | 1.216                     | 0.2755  |                                    |                                                                                          |                                                                |
| 111 | Supp Fig. 1F          | Two Way RM ANOVA  | Treatment                                                                         | (1, 49)                       |                       | 3.314                     | 0.0829  |                                    |                                                                                          | 7-18 mice                                                      |
|     |                       |                   | Time                                                                              | (1, 49)                       |                       | 1.247                     | 0.2696  |                                    |                                                                                          |                                                                |
|     |                       |                   | Interaction                                                                       | (1, 49)                       | F-statistic           | 0.4218                    | 0.5191  |                                    |                                                                                          |                                                                |
| 112 | Supp Fig. 2B          | Two Way RM ANOVA  | Treatment                                                                         | (12, 68)                      |                       | 0.8675                    | 0.4727  |                                    |                                                                                          | 3 mice                                                         |
|     |                       |                   | Time                                                                              | (4, 68)                       |                       | 8.696                     | <0.0001 |                                    |                                                                                          |                                                                |
|     |                       |                   | Interaction                                                                       | (17, 68)                      | F-statistic           | 0.5662                    | 0.8615  |                                    |                                                                                          |                                                                |
| 113 | Supp Fig. 2C, Panel 1 | Two Way ANOVA     | Treatment                                                                         | (1, 17)                       |                       | 1.261                     | 0.277   |                                    |                                                                                          | 7-18 mice                                                      |
|     |                       |                   | Extinction Class                                                                  | (1, 17)                       |                       | 1.225                     | 0.2838  |                                    |                                                                                          |                                                                |
|     |                       |                   | Interaction                                                                       | (1, 17)                       | F-statistic           | 0.4269                    | 0.5222  |                                    |                                                                                          |                                                                |
| 114 | Supp Fig. 2C, Panel 2 | Two Way ANOVA     | Treatment                                                                         | (1, 17)                       |                       | 0.04233                   | 0.8394  |                                    |                                                                                          | 7-18 mice                                                      |
|     |                       |                   | Extinction Class                                                                  | (1, 17)                       |                       | 0.3822                    | 0.5446  |                                    |                                                                                          |                                                                |
|     |                       |                   | Interaction                                                                       | (1, 17)                       | F-statistic           | 0.01151                   | 0.9158  |                                    |                                                                                          |                                                                |
| 115 | Supp Fig. 2C, Panel 3 | Two Way ANOVA     | Treatment                                                                         | (1, 17)                       |                       | 0.6713                    | 0.1651  |                                    |                                                                                          | 7-18 mice                                                      |
|     |                       |                   | Extinction Class                                                                  | (1, 17)                       |                       | 0.6673                    | 0.4253  |                                    |                                                                                          |                                                                |
|     |                       |                   | Interaction                                                                       | (1, 17)                       | F-statistic           | 2.104                     | 0.4239  |                                    |                                                                                          |                                                                |
| 116 | Supp Fig. 2C, Panel 4 | Two Way ANOVA     | Treatment                                                                         | (1, 17)                       |                       | 0.1883                    | 0.6698  |                                    |                                                                                          | 7-18 mice                                                      |
|     |                       |                   | Extinction Class                                                                  | (1, 17)                       |                       | 0.3438                    | 0.5654  |                                    |                                                                                          |                                                                |
|     |                       |                   | Interaction                                                                       | (1, 17)                       | F-statistic           | 4.24                      | 0.0551  |                                    |                                                                                          |                                                                |
| 117 | Supp Fig. 2C, Panel 5 | Two Way ANOVA     | Treatment                                                                         | (1, 17)                       |                       | 0.1476                    | 0.7056  |                                    |                                                                                          | 7-18 mice                                                      |
|     |                       |                   | Extinction Class                                                                  | (1, 17)                       |                       | 0.6509                    | 0.4309  |                                    |                                                                                          |                                                                |
|     |                       |                   | Interaction                                                                       | (1, 17)                       | F-statistic           | 0.006763                  | 0.9354  |                                    |                                                                                          |                                                                |
| 118 | Supp Fig. 2E, Panel 1 | Two Way ANOVA     | Treatment                                                                         | (1, 17)                       |                       | 1.666                     | 0.214   |                                    |                                                                                          | 7-18 mice                                                      |
|     |                       |                   | Extinction Class                                                                  | (1, 17)                       |                       | 0.485                     | 0.4956  |                                    |                                                                                          |                                                                |
|     |                       |                   | Interaction                                                                       | (1, 17)                       | F-statistic           | 0.299                     | 0.5916  |                                    |                                                                                          |                                                                |
| 119 | Supp Fig. 2E, Panel 2 | Two Way ANOVA     | Treatment                                                                         | (1, 17)                       |                       | 1.932                     | 0.1825  |                                    |                                                                                          | 7-18 mice                                                      |
|     |                       |                   | Extinction Class                                                                  | (1, 17)                       |                       | 0.5825                    | 0.4558  |                                    |                                                                                          |                                                                |
|     |                       |                   | Interaction                                                                       | (1, 17)                       | F-statistic           | 0.7397                    | 0.4017  |                                    |                                                                                          |                                                                |
|     |                       |                   | Treatment                                                                         | (1, 17)                       |                       | 3.089                     | 0.0968  |                                    |                                                                                          |                                                                |



| Row | Figure                | Statistical Model | Variable         | Degrees of Freedom (DFn, DfD) | Parameter(s) | Parameter value | p-value | Multiple comparisons? (Sidak test) | p-value | n per group |
|-----|-----------------------|-------------------|------------------|-------------------------------|--------------|-----------------|---------|------------------------------------|---------|-------------|
| 120 | Supp Fig. 2E, Panel 3 | Two Way ANOVA     | Extinction Class | (1,17)                        | F-statistic  | 0.02798         | 0.8691  |                                    |         | 7-18 mice   |
|     |                       |                   | Interaction      | (1,17)                        |              | 0.8103          | 0.3806  |                                    |         |             |
| 121 | Supp Fig. 2E, Panel 4 | Two Way ANOVA     | Treatment        | (1,17)                        | F-statistic  | 4.519           | 0.0485  |                                    |         | 7-18 mice   |
|     |                       |                   | Extinction Class | (1,17)                        |              | 0.4693          | 0.5025  |                                    |         |             |
| 122 | Supp Fig. 2E, Panel 5 | Two Way ANOVA     | Interaction      | (1,17)                        | F-statistic  | 0.06964         | 0.795   |                                    |         | 7-18 mice   |
|     |                       |                   | Treatment        | (1,17)                        |              | 0.3512          | 0.266   |                                    |         |             |
| 123 | Supp Fig. 2G, Panel 1 | Two Way ANOVA     | Extinction Class | (1,17)                        | F-statistic  | 0.1452          | 0.7079  |                                    |         | 7-18 mice   |
|     |                       |                   | Interaction      | (1,17)                        |              | 1.323           | 0.5612  |                                    |         |             |
| 124 | Supp Fig. 2G, Panel 2 | Two Way ANOVA     | Treatment        | (1,17)                        | F-statistic  | 3.0676          | 0.0979  |                                    |         | 7-18 mice   |
|     |                       |                   | Extinction Class | (1,17)                        |              | 5.674           | 0.0292  |                                    |         |             |
| 125 | Supp Fig. 2G, Panel 3 | Two Way ANOVA     | Interaction      | (1,17)                        | F-statistic  | 13.91           | 0.0017  |                                    |         | 7-18 mice   |
|     |                       |                   | Treatment        | (1,17)                        |              | 0.2305          | 0.6373  |                                    |         |             |
| 126 | Supp Fig. 2G, Panel 4 | Two Way ANOVA     | Extinction Class | (1,17)                        | F-statistic  | 1.436           | 0.2472  |                                    |         | 7-18 mice   |
|     |                       |                   | Interaction      | (1,17)                        |              | 0.8092          | 0.3809  |                                    |         |             |
| 127 | Supp Fig. 2G, Panel 5 | Two Way ANOVA     | Treatment        | (1,17)                        | F-statistic  | 2.208           | 0.5157  |                                    |         | 7-18 mice   |
|     |                       |                   | Extinction Class | (1,17)                        |              | 0.003729        | 0.952   |                                    |         |             |
| 128 | Supp Fig. 2I, Panel 1 | Two Way ANOVA     | Interaction      | (1,17)                        | F-statistic  | 0.4406          | 0.1556  |                                    |         | 7-18 mice   |
|     |                       |                   | Treatment        | (1,17)                        |              | 1.114           | 0.306   |                                    |         |             |
| 129 | Supp Fig. 2I, Panel 2 | Two Way ANOVA     | Extinction Class | (1,17)                        | F-statistic  | 1.644           | 0.217   |                                    |         | 7-18 mice   |
|     |                       |                   | Interaction      | (1,17)                        |              | 3.203           | 0.0913  |                                    |         |             |
| 130 | Supp Fig. 2I, Panel 3 | Two Way ANOVA     | Treatment        | (1,17)                        | F-statistic  | 0.009515        | 0.9234  |                                    |         | 7-18 mice   |
|     |                       |                   | Extinction Class | (1,17)                        |              | 0.002574        | 0.9601  |                                    |         |             |
| 131 | Supp Fig. 2I, Panel 4 | Two Way ANOVA     | Interaction      | (1,17)                        | F-statistic  | 0.9156          | 0.3521  |                                    |         | 7-18 mice   |
|     |                       |                   | Treatment        | (1,17)                        |              | 1.666           | 0.214   |                                    |         |             |
| 132 | Supp Fig. 2I, Panel 5 | Two Way ANOVA     | Extinction Class | (1,17)                        | F-statistic  | 0.485           | 0.4956  |                                    |         | 7-18 mice   |
|     |                       |                   | Interaction      | (1,17)                        |              | 0.299           | 0.5916  |                                    |         |             |
| 133 | Supp Fig. 3A          | Two Way RM ANOVA  | Treatment        | (1,17)                        | F-statistic  | 1.932           | 0.1825  |                                    |         | 7-18 mice   |
|     |                       |                   | Extinction Class | (1,17)                        |              | 0.5825          | 0.4558  |                                    |         |             |
| 134 | Supp Fig. 3B          | Two Way RM ANOVA  | Interaction      | (1,17)                        | F-statistic  | 0.7397          | 0.4017  |                                    |         | 7-18 mice   |
|     |                       |                   | Treatment        | (1,17)                        |              | 3.089           | 0.0988  |                                    |         |             |
| 135 | Supp Fig. 3C          | Two Way RM ANOVA  | Extinction Class | (1,17)                        | F-statistic  | 0.02798         | 0.8691  |                                    |         | 7-18 mice   |
|     |                       |                   | Interaction      | (1,17)                        |              | 0.8103          | 0.3806  |                                    |         |             |
| 136 | Supp Fig. 3D          | Two Way RM ANOVA  | Treatment        | (1,17)                        | F-statistic  | 4.519           | 0.0485  |                                    |         | 7-18 mice   |
|     |                       |                   | Extinction Class | (1,17)                        |              | 0.4693          | 0.5025  |                                    |         |             |
| 137 | Supp Fig. 3E          | Two Way RM ANOVA  | Interaction      | (1,17)                        | F-statistic  | 0.06964         | 0.795   |                                    |         | 7-18 mice   |
|     |                       |                   | Treatment        | (1,17)                        |              | 0.3512          | 0.5612  |                                    |         |             |
| 138 | Supp Fig. 5B          | One Way RM ANOVA  | Extinction Class | (1,17)                        | F-statistic  | 0.1452          | 0.7079  |                                    |         | 7-18 mice   |
|     |                       |                   | Interaction      | (1,17)                        |              | 1.323           | 0.266   |                                    |         |             |
| 139 | Supp Fig. 5D          | One Way ANOVA     | Sex              | (3,17)                        | F-statistic  | 0.6941          | 0.5683  |                                    |         | 7 mice      |
|     |                       |                   | Time             | (59, 1003)                    |              | 0.8867          | 0.7145  |                                    |         |             |
| 140 | Supp Fig. 5E          | Chi-square        | Interaction      | (17, 1003)                    | F-statistic  | 0.8             | 0.6984  |                                    |         | 7 mice      |
|     |                       |                   | Sex              | (3,17)                        |              | 0.3718          | 0.7744  |                                    |         |             |
| 141 | Supp Fig. 5F          | Chi-square        | Time             | (59, 1003)                    | F-statistic  | 3.18            | <0.0001 |                                    |         | 7 mice      |
|     |                       |                   | Interaction      | (17, 1003)                    |              | 1.014           | 0.4399  |                                    |         |             |
| 142 | Supp Fig. 5G          | Chi-square        | Sex              | (3,17)                        | F-statistic  | 1.329           | 0.2978  |                                    |         | 7 mice      |
|     |                       |                   | Time             | (59, 1003)                    |              | 1.021           | 0.4338  |                                    |         |             |
| 143 | Supp Fig. 5H          | Chi-square        | Interaction      | (17, 1003)                    | F-statistic  | 1.52            | <0.0001 |                                    |         | 7 mice      |
|     |                       |                   | Sex              | (3,17)                        |              | 1.741           | 0.5685  |                                    |         |             |
| 144 | Supp Fig. 5I          | Chi-square        | Time             | (59, 1003)                    | F-statistic  | 1.457           | 0.0155  |                                    |         | 7 mice      |
|     |                       |                   | Interaction      | (17, 1003)                    |              | 0.9772          | 0.1966  |                                    |         |             |
| 145 | Supp Fig. 5J          | Chi-square        | Sex              | (3,17)                        | F-statistic  | 0.327           | 0.8059  |                                    |         | 7 mice      |
|     |                       |                   | Time             | (59, 1003)                    |              | 1.255           | 0.0973  |                                    |         |             |
| 146 | Supp Fig. 5K          | Chi-square        | Interaction      | (17, 1003)                    | F-statistic  | 1.136           | 0.1261  |                                    |         | 7 mice      |
|     |                       |                   | Sex              | (3,17)                        |              | 0.327           | 0.8059  |                                    |         |             |
| 147 | Supp Fig. 5L          | Chi-square        | Time             | (59, 1003)                    | F-statistic  | 1.255           | 0.0973  |                                    |         | 7 mice      |
|     |                       |                   | Interaction      | (17, 1003)                    |              | 1.136           | 0.1261  |                                    |         |             |
| 148 | Supp Fig. 5M          | Chi-square        | Sex              | (3,17)                        | F-statistic  | 0.327           | 0.8059  |                                    |         | 7 mice      |
|     |                       |                   | Time             | (59, 1003)                    |              | 1.255           | 0.0973  |                                    |         |             |
| 149 | Supp Fig. 5N          | Chi-square        | Interaction      | (17, 1003)                    | F-statistic  | 1.136           | 0.1261  |                                    |         | 7 mice      |
|     |                       |                   | Sex              | (3,17)                        |              | 0.327           | 0.8059  |                                    |         |             |
| 150 | Supp Fig. 5O          | Chi-square        | Time             | (59, 1003)                    | F-statistic  | 1.255           | 0.0973  |                                    |         | 7 mice      |
|     |                       |                   | Interaction      | (17, 1003)                    |              | 1.136           | 0.1261  |                                    |         |             |
| 151 | Supp Fig. 5P          | Chi-square        | Sex              | (3,17)                        | F-statistic  | 0.327           | 0.8059  |                                    |         | 7 mice      |
|     |                       |                   | Time             | (59, 1003)                    |              | 1.255           | 0.0973  |                                    |         |             |
| 152 | Supp Fig. 5Q          | Chi-square        | Interaction      | (17, 1003)                    | F-statistic  | 1.136           | 0.1261  |                                    |         | 7 mice      |
|     |                       |                   | Sex              | (3,17)                        |              | 0.327           | 0.8059  |                                    |         |             |
| 153 | Supp Fig. 5R          | Chi-square        | Time             | (59, 1003)                    | F-statistic  | 1.255           | 0.0973  |                                    |         | 7 mice      |
|     |                       |                   | Interaction      | (17, 1003)                    |              | 1.136           | 0.1261  |                                    |         |             |
| 154 | Supp Fig. 5S          | Chi-square        | Sex              | (3,17)                        | F-statistic  | 0.327           | 0.8059  |                                    |         | 7 mice      |
|     |                       |                   | Time             | (59, 1003)                    |              | 1.255           | 0.0973  |                                    |         |             |
| 155 | Supp Fig. 5T          | Chi-square        | Interaction      | (17, 1003)                    | F-statistic  | 1.136           | 0.1261  |                                    |         | 7 mice      |
|     |                       |                   | Sex              | (3,17)                        |              | 0.327           | 0.8059  |                                    |         |             |
| 156 | Supp Fig. 5U          | Chi-square        | Time             | (59, 1003)                    | F-statistic  | 1.255           | 0.0973  |                                    |         | 7 mice      |
|     |                       |                   | Interaction      | (17, 1003)                    |              | 1.136           | 0.1261  |                                    |         |             |
| 157 | Supp Fig. 5V          | Chi-square        | Sex              | (3,17)                        | F-statistic  | 0.327           | 0.8059  |                                    |         | 7 mice      |
|     |                       |                   | Time             | (59, 1003)                    |              | 1.255           | 0.0973  |                                    |         |             |
| 158 | Supp Fig. 5W          | Chi-square        | Interaction      | (17, 1003)                    | F-statistic  | 1.136           | 0.1261  |                                    |         | 7 mice      |
|     |                       |                   | Sex              | (3,17)                        |              | 0.327           | 0.8059  |                                    |         |             |
| 159 | Supp Fig. 5X          | Chi-square        | Time             | (59, 1003)                    | F-statistic  | 1.255           | 0.0973  |                                    |         | 7 mice      |
|     |                       |                   | Interaction      | (17, 1003)                    |              | 1.136           | 0.1261  |                                    |         |             |
| 160 | Supp Fig. 5Y          | Chi-square        | Sex              | (3,17)                        | F-statistic  | 0.327           | 0.8059  |                                    |         | 7 mice      |
|     |                       |                   | Time             | (59, 1003)                    |              | 1.255           | 0.0973  |                                    |         |             |
| 161 | Supp Fig. 5Z          | Chi-square        | Interaction      | (17, 1003)                    | F-statistic  | 1.136           | 0.1261  |                                    |         | 7 mice      |
|     |                       |                   | Sex              | (3,17)                        |              | 0.327           | 0.8059  |                                    |         |             |
| 162 | Supp Fig. 6A          | Chi-square        | Time             | (59, 1003)                    | F-statistic  | 1.255           | 0.0973  |                                    |         | 7 mice      |
|     |                       |                   | Interaction      | (17, 1003)                    |              | 1.136           | 0.1261  |                                    |         |             |
| 163 | Supp Fig. 6B          | Chi-square        | Sex              | (3,17)                        | F-statistic  | 0.327           | 0.8059  |                                    |         | 7 mice      |
|     |                       |                   | Time             | (59, 1003)                    |              | 1.255           | 0.0973  |                                    |         |             |
| 164 | Supp Fig. 6C          | Chi-square        | Interaction      | (17, 1003)                    | F-statistic  | 1.136           | 0.1261  |                                    |         | 7 mice      |
|     |                       |                   | Sex              | (3,17)                        |              | 0.327           | 0.8059  |                                    |         |             |
| 165 | Supp Fig. 6D          | Chi-square        | Time             | (59, 1003)                    | F-statistic  | 1.255           | 0.0973  |                                    |         | 7 mice      |
|     |                       |                   | Interaction      | (17, 1003)                    |              | 1.136           | 0.1261  |                                    |         |             |
| 166 | Supp Fig. 6E          | Chi-square        | Sex              | (3,17)                        | F-statistic  | 0.327           | 0.8059  |                                    |         | 7 mice      |
|     |                       |                   | Time             | (59, 1003)                    |              | 1.255           | 0.0973  |                                    |         |             |
| 167 | Supp Fig. 6F          | Chi-square        | Interaction      | (17, 1003)                    | F-statistic  | 1.136           | 0.1261  |                                    |         | 7 mice      |
|     |                       |                   | Sex              | (3,17)                        |              | 0.327           | 0.8059  |                                    |         |             |
| 168 | Supp Fig. 6G          | Chi-square        | Time             | (59, 1003)                    | F-statistic  | 1.255           | 0.0973  |                                    |         | 7 mice      |
|     |                       |                   | Interaction      | (17, 1003)                    |              | 1.136           | 0.1261  |                                    |         |             |
| 169 | Supp Fig. 6H          | Chi-square        | Sex              | (3,17)                        | F-statistic  | 0.327           | 0.8059  |                                    |         | 7 mice      |
|     |                       |                   | Time             | (59, 1003)                    |              | 1.255           | 0.0973  |                                    |         |             |
| 170 | Supp Fig. 6I          | Chi-square        | Interaction      | (17, 1003)                    | F-statistic  | 1.136           | 0.1261  |                                    |         | 7 mice      |
|     |                       |                   | Sex              | (3,17)                        |              | 0.327           | 0.8059  |                                    |         |             |
| 171 | Supp Fig. 6J          | Chi-square        | Time             | (59, 1003)                    | F-statistic  | 1.255           | 0.0973  |                                    |         | 7 mice      |
|     |                       |                   | Interaction      | (17, 1003)                    |              | 1.136           | 0.1261  |                                    |         |             |
| 172 | Supp Fig. 6K          | Chi-square        | Sex              | (3,17)                        | F-statistic  | 0.327           | 0.8059  |                                    |         | 7 mice      |
|     |                       |                   | Time             | (59, 1003)                    |              | 1.255           | 0.0973  |                                    |         |             |
| 173 | Supp Fig. 6L          | Chi-square        | Interaction      | (17, 1003)                    | F-statistic  | 1.136           | 0.1261  |                                    |         | 7 mice      |
|     |                       |                   | Sex              | (3,17)                        |              | 0.327           | 0.8059  |                                    |         |             |
| 174 | Supp Fig. 6M          | Chi-square        | Time             | (59, 1003)                    | F-statistic  | 1.255           | 0.0973  |                                    |         | 7 mice      |
|     |                       |                   | Interaction      | (17, 1003)                    |              | 1.136           | 0.1261  |                                    |         |             |
| 175 | Supp Fig. 6N          | Chi-square        | Sex              | (3,17)                        | F-statistic  | 0.327           | 0.8059  |                                    |         | 7 mice      |
|     |                       |                   | Time             | (59, 1003)                    |              | 1.255           | 0.0973  |                                    |         |             |
| 176 | Supp Fig. 6O          | Chi-square        | Interaction      | (17, 1003)                    | F-statistic  | 1.136           | 0.1261  |                                    |         | 7 mice      |
|     |                       |                   | Sex              | (3,17)                        |              | 0.327           | 0.8059  |                                    |         |             |
| 177 | Supp Fig. 6P          | Chi-square        | Time             | (59, 1003)                    | F-statistic  | 1.255           | 0.0973  |                                    |         | 7 mice      |
|     |                       |                   | Interaction      | (17, 1003)                    |              | 1.136           | 0.1261  |                                    |         |             |
| 178 | Supp Fig. 6Q          | Chi-square        | Sex              | (3,17)                        | F-statistic  | 0.327           | 0.8059  |                                    |         | 7 mice      |
|     |                       |                   | Time             | (59, 1003)                    |              | 1.255           | 0.0973  |                                    |         |             |
| 179 | Supp Fig. 6R          | Chi-square        | Interaction      | (17, 1003)                    | F-statistic  | 1.136           | 0.1261  |                                    |         | 7 mice      |
|     |                       |                   | Sex              | (3,17)                        |              | 0.327           | 0.8059  |                                    |         |             |
| 180 | Supp Fig. 6S          | Chi-square        | Time             | (59, 1003)                    | F-statistic  | 1.255           | 0.0973  |                                    |         | 7 mice      |
|     |                       |                   | Interaction      | (17, 1003)                    |              | 1.136           | 0.1261  |                                    |         |             |
| 181 | Supp Fig. 6T          | Chi-square        | Sex              | (3,17)                        | F-statistic  | 0.327           | 0.8059  |                                    |         | 7 mice      |
|     |                       |                   | Time             | (59, 1003)                    |              | 1.255           | 0.0973  |                                    |         |             |
| 182 | Supp Fig. 6U          | Chi-square        | Interaction      | (17, 1003)                    | F-statistic  | 1.136           | 0.1261  |                                    |         | 7 mice      |
|     |                       |                   | Sex              | (3,17)                        |              | 0.327           | 0.8059  |                                    |         |             |
| 183 | Supp Fig. 6V          | Chi-square        | Time             | (59, 1003)                    | F-statistic  | 1.255           | 0.0973  |                                    |         | 7 mice      |
|     |                       |                   | Interaction      | (17, 1003)                    |              | 1.136           | 0.1261  |                                    |         |             |
| 184 | Supp Fig. 6W          | Chi-square        | Sex              | (3,17)                        | F-statistic  | 0.327           | 0.8059  |                                    |         | 7 mice      |
|     |                       |                   | Time             | (59, 1003)                    |              | 1.255           | 0.0973  |                                    |         |             |
| 185 | Supp Fig. 6X          | Chi-square        | Interaction      | (17, 1003)                    | F-statistic  | 1.136           | 0.1261  |                                    |         | 7 mice      |
|     |                       |                   | Sex              | (3,17)                        |              | 0.327           | 0.8059  |                                    |         |             |
| 186 | Supp Fig. 6Y          | Chi-square        | Time             | (59, 1003)                    | F-statistic  | 1.255           | 0.0973  |                                    |         | 7 mice      |
|     |                       |                   | Interaction      | (17, 1003)                    |              | 1.136           | 0.1261  |                                    |         |             |
| 187 | Supp Fig. 6Z          | Chi-square        | Sex              | (3,17)                        |              |                 |         |                                    |         |             |

| Row | Figure                | Statistical Model | Variable    | Degrees of Freedom (DFn, DFd) | Parameter(s) | Parameter value | p-value | Multiple comparisons? (Sidak test) | p-value                                                                                                                            | n per group                                       |
|-----|-----------------------|-------------------|-------------|-------------------------------|--------------|-----------------|---------|------------------------------------|------------------------------------------------------------------------------------------------------------------------------------|---------------------------------------------------|
| 143 | Supp Fig. 5H          | Two Way RM ANOVA  | Time        | (1, 227)                      | F-statistic  | 0.1684          | 0.6819  |                                    |                                                                                                                                    | 151 saline, 78 non-shock neurons                  |
|     |                       |                   | Interaction | (1, 227)                      |              | 0.08495         | 0.771   |                                    |                                                                                                                                    |                                                   |
| 144 | Supp Fig. 5I          | Two Way RM ANOVA  | Group       | (1, 224)                      | F-statistic  | 2.25            | 0.238   |                                    |                                                                                                                                    | 158 saline, 69 non-shock neurons                  |
|     |                       |                   | Time        | (1, 224)                      |              | 1.135           | 0.2879  |                                    |                                                                                                                                    |                                                   |
|     |                       |                   | Interaction | (1, 224)                      |              | 2.25            | 0.135   |                                    |                                                                                                                                    |                                                   |
| 145 | Supp Fig. 5J          | Two Way RM ANOVA  | Group       | (1, 256)                      | F-statistic  | 1.551           | 0.1948  |                                    |                                                                                                                                    | 175 saline, 83 non-shock neurons                  |
|     |                       |                   | Time        | (1, 256)                      |              | 76.18           | <0.0001 |                                    |                                                                                                                                    |                                                   |
|     |                       |                   | Interaction | (1, 256)                      |              | 6.403           | 0.0201  | Sal vs. Nonshock                   | Ext1: 0.9611, Ext3: 0.0337                                                                                                         |                                                   |
| 146 | Supp. Fig. 6H, left   | Two Way RM ANOVA  | Group       | (2, 479)                      | F-statistic  | 12.11           | <0.0001 | Ext1, Ext3                         | Ext1: Res vs. Non 0.0003; Res vs. Sal < 0.0001 Non vs. Sal 0.3995 Ext3: Res vs. Non 0.8865; Res vs. Sal 0.0034; Non vs. Sal 0.0322 | 142 neurons (R), 131 neurons (N), 167 neurons (S) |
|     |                       |                   | Time        | (1, 479)                      |              | 14.01           | 0.0002  | Res, Non-Res, Sal                  | Res: < 0.0001; Non: >0.9999 ; Sal: 0.2474                                                                                          |                                                   |
|     |                       |                   | Interaction | (2, 479)                      |              | 6               | 0.0022  |                                    |                                                                                                                                    |                                                   |
| 147 | Supp. Fig. 6H, middle | Two Way RM ANOVA  | Group       | (2, 481)                      | F-statistic  | 0.3818          | 0.6829  |                                    |                                                                                                                                    | 178 neurons (R), 148 neurons (N), 158 neurons (S) |
|     |                       |                   | Time        | (1, 481)                      |              | 0.2102          | 0.6468  |                                    |                                                                                                                                    |                                                   |
|     |                       |                   | Interaction | (2, 481)                      |              | 2.424           | 0.0896  |                                    |                                                                                                                                    |                                                   |
| 148 | Supp. Fig. 5H, right  | Two Way RM ANOVA  | Group       | (2, 484)                      | F-statistic  | 2.864           | <0.0001 | Ext1, Ext3                         | Ext1: Res vs. Non 0.9469; Res vs. Sal 0.9972 Non vs. Sal 0.9840 Ext3: Res vs. Non <0.0001; Res vs. Sal 0.0374; Non vs. Sal 0.1111  | 171 neurons (R), 144 neurons (N), 171 neurons (S) |
|     |                       |                   | Time        | (1, 484)                      |              | 122.8           | <0.0001 | Res, Non-Res, Sal                  | Res: < 0.0001; Non: 0.0076 ; Sal: < 0.0001                                                                                         |                                                   |
|     |                       |                   | Interaction | (2, 484)                      |              | 10.13           | 0.058   |                                    |                                                                                                                                    |                                                   |
